# Supplementary material
Source: publisher site journal article supplement (https://www.dovepress.com/get_supplementary_file.php?f=384918.xlsx)
Supplement: Supplementary file 1 [file get_supplementary_file.php]

## Sheet: uni_cox
Supplementary Table 1.Univariate analysis of prognosis based on transcriptional status.
Gene Name	HR	HR 95% CI low	HR 95% CI high	Adjusted P value
ITIH1	1.797	1.332	2.424	0
APOB	1.629	1.241	2.138	0
NEU2	3.088	1.739	5.484	0
RHOF	1.868	1.331	2.622	0
MEPE	1.198	1.097	1.308	0
CYP3A4	1.14	1.08	1.204	0
FBP1	1.007	1.003	1.012	0
KLK6	1.004	1.002	1.006	0
FAM107A	1.023	1.01	1.035	0
SLC17A8	1.209	1.094	1.337	0
OR5T1	2.125	1.445	3.125	0
PLCXD3	1.312	1.143	1.507	0
GLDN	1.218	1.11	1.336	0
LCE1A	1.081	1.035	1.129	0
LCN10	62.34	6.889	564.142	0
GRAPL	5338.48	53.883	528914	0
NOL4L	1.013	1.006	1.02	0
SERPINA1	1.001	1.001	1.002	0
TGM2	1.003	1.001	1.004	0
ORM1	1.013	1.006	1.02	0
AMY2A	5.243	2.081	13.209	0
HPR	1.251	1.13	1.383	0
CYP24A1	1.002	1.001	1.004	0.39008
CYBA	1.005	1.002	1.008	0.39008
MOK	0.895	0.839	0.954	0.39008
TGFB2	1.018	1.007	1.029	0.39008
ERH	0.997	0.995	0.999	0.39008
F9	8.374	2.315	30.299	0.39008
UNC93A	1.053	1.02	1.087	0.39008
APOA1	1.055	1.021	1.09	0.39008
SNAI1	1.025	1.01	1.041	0.39008
MAX	0.969	0.95	0.987	0.39008
PRKCG	1.065	1.026	1.105	0.39008
TNNT3	1.012	1.005	1.019	0.39008
GC	1.036	1.016	1.057	0.39008
GHRL	1.269	1.1	1.465	0.39008
LCE2B	1.271	1.098	1.47	0.39008
CCDC107	1.077	1.029	1.128	0.39008
PM20D1	1.703	1.231	2.356	0.39008
UBB	1.002	1.001	1.004	0.39008
SLC6A19	5.353	1.968	14.563	0.39008
RTP1	1.083	1.032	1.136	0.39008
H1-8	1.555	1.199	2.017	0.39008
OR4C6	1.39	1.147	1.685	0.39008
FAM25A	1.824	1.269	2.62	0.39008
MAP1LC3C	1.107	1.043	1.175	0.39008
UGT2B11	1.021	1.009	1.033	0.39008
KCNU1	1.41	1.154	1.723	0.39008
MMP12	1.001	1.001	1.002	0.39008
SCYGR4	3.162	1.615	6.189	0.39008
ALOX5	1.011	1.004	1.017	0.464381
MARCO	1.003	1.001	1.005	0.464381
RIPOR1	1.024	1.009	1.039	0.464381
DGKA	0.984	0.974	0.994	0.464381
ADD1	1.014	1.005	1.023	0.464381
KIF3B	1.007	1.003	1.012	0.464381
APOC3	1.059	1.021	1.098	0.464381
RPS6KA1	1.016	1.006	1.027	0.464381
SLC46A2	1.179	1.064	1.306	0.464381
PAX1	1.045	1.017	1.074	0.464381
MED6	0.953	0.924	0.982	0.464381
CSRNP1	1.012	1.004	1.02	0.464381
SLC22A3	1.017	1.006	1.027	0.464381
TMEM236	1.571	1.176	2.099	0.464381
NRGN	1.005	1.002	1.008	0.464381
SLC28A1	1.404	1.129	1.746	0.464381
LYZL4	1.39	1.134	1.704	0.464381
CAMK2N1	1.007	1.002	1.011	0.464381
OTOGL	1.565	1.172	2.09	0.464381
SERPINF2	1.017	1.006	1.027	0.464381
KRT38	1.027	1.009	1.045	0.464381
FAM9B	1.628	1.2	2.209	0.464381
ERBB4	1.318	1.105	1.571	0.464381
GPR88	1.71	1.221	2.394	0.464381
TRARG1	2.301	1.355	3.906	0.464381
IFITM2	1.003	1.001	1.004	0.464381
SP6	1.008	1.003	1.013	0.464381
CCDC69	1.021	1.008	1.034	0.464381
C16orf96	1.087	1.03	1.148	0.464381
LY6G6F-LY6G6D	6.214	1.957	19.729	0.464381
TMED7-TICAM2	8038.56	28.814	2.24257e+06	0.464381
SLC35G6	7.846	2.064	29.823	0.464381
MRC1	1.007	1.003	1.012	0.464381
PDCD6-AHRR	1.36484e+12	23118.4	8.05762e+19	0.464381
CFHR2	6.473	1.919	21.84	0.536807
FCN1	1.08	1.026	1.137	0.536807
TIMM9	0.983	0.971	0.994	0.536807
RPS6KA5	0.797	0.685	0.927	0.536807
APOA5	4.543	1.653	12.486	0.536807
CHI3L1	1.002	1.001	1.003	0.536807
CTSL	1.003	1.001	1.004	0.536807
CHRND	1.458	1.136	1.871	0.536807
ZNF385D	1.779	1.216	2.604	0.536807
CCDC141	1.451	1.133	1.857	0.536807
RHO	4.726	1.698	13.153	0.536807
PROKR1	1.782	1.211	2.621	0.536807
ITGAM	1.015	1.005	1.024	0.536807
RGS19	1.019	1.006	1.031	0.536807
NIPAL4	1.011	1.003	1.018	0.536807
GPR35	1.082	1.027	1.141	0.536807
SH2D7	1.242	1.076	1.433	0.536807
PSMG1	0.988	0.98	0.996	0.536807
SLITRK6	1.004	1.001	1.006	0.536807
LCE3E	1.013	1.004	1.022	0.536807
CYP4F8	1.202	1.064	1.359	0.536807
LCE2A	1.354	1.11	1.651	0.536807
C1orf146	2.533	1.381	4.648	0.536807
PABPN1L	2.999	1.443	6.231	0.536807
SBK3	1.24	1.078	1.426	0.536807
MNAT1	0.961	0.936	0.987	0.595542
PPP2R2C	1.015	1.005	1.025	0.595542
EPDR1	1.007	1.002	1.012	0.595542
GEMIN2	0.968	0.947	0.99	0.595542
TRPA1	1.005	1.002	1.008	0.595542
DPPA4	1.11	1.035	1.19	0.595542
SLC7A10	1.017	1.005	1.029	0.595542
SLC16A3	1.008	1.002	1.013	0.595542
ACP4	1.128	1.039	1.225	0.595542
PTPRR	1.039	1.012	1.067	0.595542
DEFA4	1.742	1.198	2.531	0.595542
HJV	6.011	1.779	20.31	0.595542
KLK7	1.003	1.001	1.006	0.595542
APLN	1.015	1.005	1.026	0.595542
CYP4F22	1.009	1.003	1.016	0.595542
RND1	1.011	1.003	1.018	0.595542
OR10P1	2.887	1.407	5.925	0.595542
CIDEC	1.087	1.027	1.149	0.595542
EPS8L3	1.072	1.022	1.123	0.595542
ACCSL	2.372	1.325	4.247	0.595542
OC90	3.98044e+13	22442.7	7.05973e+22	0.595542
AC010325.1	1.06	1.019	1.103	0.595542
NTN4	1.01	1.003	1.016	0.629161
CACNA1S	1.643	1.158	2.333	0.629161
CRTAC1	1.01	1.003	1.017	0.629161
ALKBH1	0.957	0.928	0.987	0.629161
SLIRP	0.986	0.976	0.996	0.629161
FOXA2	1.021	1.006	1.037	0.629161
NGDN	0.973	0.955	0.992	0.629161
KIF1A	1.009	1.003	1.015	0.629161
STXBP1	1.018	1.006	1.032	0.629161
TLN1	1.003	1.001	1.005	0.629161
KCNA10	9.441	1.987	44.86	0.629161
ITIH3	1.543	1.137	2.094	0.629161
PPIB	1.002	1.001	1.004	0.629161
TNIP2	1.009	1.003	1.016	0.629161
PTAFR	1.014	1.004	1.023	0.629161
GRIK1	1.262	1.073	1.484	0.629161
MYEOV	1.006	1.002	1.01	0.629161
MAGEB10	4.735	1.619	13.848	0.629161
EFCAB8	1.085	1.026	1.148	0.629161
OR2W3	1.116	1.034	1.205	0.629161
LCE3C	1.192	1.054	1.348	0.629161
AC068580.4	1.262	1.072	1.486	0.629161
ERVV-2	1.025	1.008	1.043	0.629161
CU639417.1	1.518	1.135	2.031	0.629161
ALDH3B1	1.009	1.003	1.015	0.657438
TNFRSF9	1.027	1.008	1.046	0.657438
ARHGEF10L	1.024	1.007	1.041	0.657438
CD209	1.053	1.015	1.093	0.657438
SLC5A1	1.034	1.009	1.058	0.657438
PLAU	1.001	1	1.002	0.657438
SLC10A2	3.15	1.401	7.082	0.657438
CYP19A1	1.914	1.206	3.039	0.657438
SLC14A1	1.005	1.001	1.008	0.657438
GRIA4	1.504	1.123	2.013	0.657438
EFNA1	0.998	0.997	0.999	0.657438
NLRP5	1.7	1.162	2.487	0.657438
COL6A5	1.089	1.024	1.158	0.657438
ARPP21	4.15	1.519	11.337	0.657438
AMY1B	32.046	2.711	378.819	0.657438
DEFB103B	4.846	1.579	14.869	0.657438
ARL14	1.011	1.003	1.019	0.657438
CCL13	1.006	1.002	1.011	0.657438
F8	1.106	1.029	1.188	0.657438
ADRB3	1.313	1.083	1.591	0.657438
SPANXN5	3.131	1.393	7.035	0.657438
PCDHGB4	1.157	1.043	1.285	0.657438
LHX1	1.093	1.026	1.164	0.657438
MAN2B2	1.016	1.004	1.028	0.703753
TESK1	1.004	1.001	1.006	0.703753
CYP2C18	0.96	0.931	0.989	0.703753
WFS1	1.01	1.003	1.017	0.703753
SERPINA7	26.777	2.416	296.784	0.703753
FLNC	1.012	1.003	1.02	0.703753
WDR89	0.941	0.9	0.983	0.703753
OLAH	1.472	1.114	1.947	0.703753
NAT2	1.158	1.041	1.288	0.703753
HK3	1.018	1.005	1.031	0.703753
FABP1	1.321	1.08	1.616	0.703753
METTL3	0.97	0.949	0.992	0.703753
ACTRT2	1.858	1.186	2.911	0.703753
RNF223	1.064	1.017	1.112	0.703753
PKD1L3	1.406	1.097	1.804	0.703753
CCDC195	1.03	1.008	1.053	0.703753
SLC4A1	1.087	1.022	1.157	0.746565
MAP1LC3A	1.006	1.001	1.01	0.746565
IL4I1	1.009	1.002	1.015	0.746565
HOXA2	1.132	1.033	1.241	0.746565
HOXA5	1.024	1.006	1.042	0.746565
SUSD1	1.031	1.008	1.054	0.746565
ACSS3	1.097	1.024	1.174	0.746565
SNX21	1.015	1.004	1.026	0.746565
RPS27A	0.999	0.999	1	0.746565
GSDMC	0.992	0.986	0.998	0.746565
GPR78	1.215	1.052	1.403	0.746565
THBD	1.002	1	1.003	0.746565
NDUFB1	0.99	0.983	0.997	0.746565
RUSC2	1.017	1.005	1.03	0.746565
ZC3H11B	1.688	1.145	2.49	0.746565
PGR	1.722	1.143	2.595	0.769895
PEBP1	1.001	1	1.002	0.769895
DTX2	0.986	0.975	0.996	0.769895
PDE1B	1.327	1.074	1.64	0.769895
GCOM1	1.288	1.066	1.558	0.769895
SLC2A5	1.039	1.01	1.07	0.769895
CALM3	1.004	1.001	1.008	0.769895
FTCD	1.037	1.009	1.065	0.769895
IL17RC	1.027	1.007	1.048	0.769895
VWA2	1.014	1.003	1.025	0.769895
OR52W1	6.941	1.613	29.863	0.769895
FLII	1.006	1.001	1.01	0.769895
GREM2	1.185	1.044	1.346	0.769895
KRTAP10-6	7.535	1.642	34.574	0.769895
MYO1C	1.006	1.002	1.011	0.769895
MT-ND3	1	1	1	0.769895
PPP1CB	0.997	0.995	0.999	0.769895
PCDHA10	1.336	1.073	1.664	0.769895
PCDHA3	1.794	1.159	2.776	0.769895
TBC1D1	1.016	1.004	1.028	0.802634
FAM50A	1.005	1.001	1.008	0.802634
STK10	1.032	1.008	1.056	0.802634
HAO1	1.617	1.124	2.327	0.802634
ADGRD1	1.143	1.032	1.266	0.802634
RAB35	1.014	1.003	1.024	0.802634
GNAI2	1.005	1.001	1.01	0.802634
MBOAT7	1.007	1.002	1.012	0.802634
EDN2	1.003	1.001	1.005	0.802634
EIF2D	0.977	0.959	0.994	0.802634
TNIP1	1.006	1.001	1.011	0.802634
PINK1	1.039	1.009	1.069	0.802634
LRPAP1	1.014	1.003	1.025	0.802634
MAGEB16	1.036	1.009	1.065	0.802634
OR2A25	6.948	1.592	30.32	0.802634
CCDC88C	0.979	0.963	0.995	0.828355
CHI3L2	1.016	1.004	1.028	0.828355
TAF11	0.988	0.978	0.997	0.828355
CYB5B	1.009	1.002	1.015	0.828355
NEK6	1.013	1.003	1.023	0.828355
OPRL1	3.117	1.303	7.454	0.828355
APCS	1.335	1.07	1.667	0.828355
FRMD1	1.075	1.017	1.136	0.828355
SLC2A6	1.019	1.004	1.033	0.828355
CRCT1	1.004	1.001	1.007	0.828355
CLIC3	1.004	1.001	1.007	0.828355
OR2AJ1	15.864	1.873	134.326	0.828355
OR2A2	4.518	1.415	14.42	0.828355
HLA-DQA2	1.002	1	1.003	0.828355
GDF10	1.066	1.015	1.119	0.828355
C17orf98	2.016	1.177	3.451	0.828355
MAP4K5	0.974	0.954	0.994	0.838882
STX7	1.058	1.012	1.107	0.838882
CPOX	0.986	0.976	0.997	0.838882
TESC	1.003	1.001	1.005	0.838882
UNC13D	1.009	1.002	1.016	0.838882
MEOX2	1.028	1.006	1.051	0.838882
RECK	1.057	1.012	1.104	0.838882
NEDD8	0.975	0.956	0.994	0.838882
TMEM8B	1.035	1.007	1.063	0.838882
ACVRL1	1.018	1.004	1.033	0.838882
TCP10L2	8.046	1.568	41.289	0.838882
CD14	1.002	1	1.003	0.838882
PDGFD	1.029	1.006	1.052	0.838882
ASXL1	1.009	1.002	1.017	0.838882
HSPB7	1.076	1.016	1.139	0.838882
LCE2D	1.659	1.118	2.464	0.838882
LDLRAD2	1.871	1.149	3.047	0.838882
PSAP	1	1	1	0.838882
CEACAM18	3.489	1.322	9.212	0.838882
SLURP2	1.169	1.035	1.321	0.838882
SNAPC1	0.982	0.968	0.996	0.875179
LIMCH1	1.015	1.003	1.027	0.875179
CTSA	1.007	1.001	1.013	0.875179
SCARF1	1.045	1.009	1.082	0.875179
POFUT1	1.005	1.001	1.009	0.875179
EHD1	1.011	1.002	1.02	0.875179
C7	1.006	1.001	1.01	0.875179
ERGIC1	1.014	1.003	1.026	0.875179
CEP89	1.021	1.004	1.037	0.875179
VASP	1.005	1.001	1.008	0.875179
PPFIA2	2.457	1.202	5.024	0.875179
TINAGL1	1.003	1.001	1.005	0.875179
PLEKHA6	1.021	1.004	1.037	0.875179
FAM83A	1.002	1	1.004	0.875179
HS3ST3A1	1.036	1.007	1.065	0.875179
TRIM58	1.034	1.007	1.063	0.875179
SMC6	0.982	0.968	0.996	0.875179
FBXO33	0.961	0.931	0.992	0.875179
HSPA12A	1.14	1.028	1.265	0.875179
MAPRE2	1.018	1.004	1.033	0.875179
ORMDL3	1.003	1.001	1.006	0.875179
TMEM151B	1.108	1.021	1.203	0.875179
KCNQ3	1.049	1.01	1.09	0.875179
FFAR3	5.908	1.436	24.302	0.875179
PAX5	1.032	1.006	1.058	0.875179
ZNF681	1.065	1.013	1.12	0.875179
CATSPERZ	846.128	3.927	182313	0.875179
OR2A12	4.789	1.375	16.675	0.875179
CDRT1	1.249	1.046	1.491	0.875179
TARM1	4.447	1.366	14.473	0.875179
UBTFL1	38.179	2.113	689.796	0.875179
AC090360.1	1.294	1.057	1.584	0.875179
AC007846.2	9.234	1.579	53.987	0.875179
ELN	1.004	1.001	1.008	0.900185
ATP6AP1	1.004	1.001	1.008	0.900185
HAUS4	0.97	0.946	0.994	0.900185
MAPRE1	1.001	1	1.002	0.900185
LGALS3	0.999	0.998	1	0.900185
SSX3	3.22	1.253	8.273	0.900185
ABLIM3	1.039	1.008	1.072	0.900185
SMAD2	1.041	1.008	1.076	0.900185
ANO6	1.011	1.002	1.019	0.900185
FBXO34	0.988	0.978	0.998	0.900185
EMID1	1.014	1.003	1.025	0.900185
LIN52	0.965	0.937	0.993	0.900185
RPS27AP5	0.842	0.733	0.967	0.900185
ADRB1	1.045	1.008	1.084	0.917835
SEMA6A	1.02	1.004	1.036	0.917835
POLE2	0.966	0.94	0.994	0.917835
VCPKMT	0.968	0.943	0.994	0.917835
SULT6B1	3.856	1.284	11.585	0.917835
HORMAD1	0.978	0.961	0.996	0.917835
ZNF385B	1.037	1.007	1.068	0.917835
PARL	0.989	0.98	0.998	0.917835
SHOX	1.334	1.056	1.686	0.917835
ANXA6	1.005	1.001	1.009	0.917835
ZNF675	1.035	1.007	1.064	0.917835
C20orf203	15.454	1.65	144.774	0.917835
PSMB10	1.012	1.002	1.021	0.917835
MRPL33	0.992	0.986	0.999	0.917835
AC008878.1	36.214	1.976	663.57	0.917835
ADCK1	0.927	0.871	0.986	0.950052
ARRDC3	1.004	1.001	1.007	0.950052
SCARB2	1.011	1.002	1.02	0.950052
MAPK4	1.016	1.003	1.03	0.950052
GPR32	13.374	1.581	113.122	0.950052
ISCA2	0.973	0.951	0.995	0.950052
KLHL30	1.235	1.039	1.469	0.950052
NPAP1	8.719	1.465	51.89	0.950052
KIAA0408	52.551	2.048	1348.28	0.950052
MPO	1.317	1.048	1.656	0.960041
RNF4	1.016	1.003	1.03	0.960041
L2HGDH	0.943	0.899	0.99	0.960041
ZBTB25	0.864	0.764	0.976	0.960041
DTX4	1.01	1.002	1.019	0.960041
MRPL51	0.998	0.996	1	0.960041
CHD4	0.943	0.899	0.99	0.960041
ACYP1	0.972	0.95	0.995	0.960041
C4BPA	1.002	1	1.004	0.960041
NPBWR2	3.9	1.25	12.161	0.960041
KRT36	1.021	1.003	1.039	0.960041
ATG14	0.971	0.948	0.995	0.960041
LRRC4	0.995	0.991	0.999	0.960041
HABP4	1.034	1.006	1.062	0.960041
ADAM10	1.011	1.002	1.021	0.960041
SEMA7A	1.007	1.001	1.013	0.960041
AEBP2	0.986	0.975	0.998	0.960041
MBNL2	1.01	1.002	1.018	0.960041
MEAK7	1.024	1.004	1.044	0.960041
S100A7	1	1	1	0.960041
RASA1	1.02	1.003	1.036	0.960041
IGFBP1	1.087	1.014	1.166	0.960041
EPG5	1.031	1.005	1.057	0.960041
ALB	1.01	1.002	1.018	0.960041
RNASE7	1.003	1.001	1.005	0.960041
ARV1	0.984	0.972	0.997	0.960041
C14orf119	0.992	0.986	0.999	0.960041
ZNF813	1.041	1.007	1.077	0.960041
MT-ND2	1	1	1	0.960041
BHLHA9	2.537	1.167	5.514	0.960041
ZSWIM7	1.028	1.005	1.053	0.960041
PPP1R3E	0.949	0.909	0.991	0.960041
PCDHGA7	1.09	1.015	1.171	0.960041
C20orf141	1.478	1.067	2.046	0.960041
SERTM2	1.1	1.016	1.191	0.960041
TCP11X1	1.74286e+17	757.403	4.01049e+31	0.960041
CCL15	1.789	1.1	2.909	0.960041
TNMD	3.306	0.975	11.207	0.967601
FGR	1.012	1	1.023	0.967601
LAS1L	0.981	0.953	1.009	0.967601
ANKIB1	1.007	0.997	1.017	0.967601
CYP51A1	1.085	1.013	1.161	0.967601
HECW1	1.119	0.986	1.269	0.967601
LASP1	1.004	1.001	1.008	0.967601
TMEM176A	1.003	0.999	1.006	0.967601
NDUFAF7	0.972	0.942	1.003	0.967601
PLXND1	1.008	1.001	1.014	0.967601
KDM1A	1.002	0.999	1.006	0.967601
PDK4	1.006	0.998	1.013	0.967601
ARX	1.041	1.004	1.079	0.967601
SKAP2	1.01	0.998	1.022	0.967601
FAM214B	1.012	0.995	1.029	0.967601
IBTK	1.018	0.994	1.041	0.967601
ITGA3	1.001	1	1.003	0.967601
KRT33A	1.003	0.999	1.006	0.967601
AP2B1	1.003	1	1.006	0.967601
TAC1	1.001	1	1.002	0.967601
TNFRSF12A	1.001	1	1.003	0.967601
PHTF2	0.986	0.966	1.007	0.967601
GGCT	0.995	0.989	1	0.967601
TBXA2R	1.087	0.977	1.209	0.967601
LGALS14	1.088	0.976	1.214	0.967601
COX10	1.033	0.987	1.081	0.967601
PAFAH1B1	1.012	0.997	1.028	0.967601
NOS2	0.998	0.995	1.001	0.967601
SLC13A2	0.869	0.736	1.026	0.967601
MATK	1.038	0.994	1.083	0.967601
ST7L	0.92	0.83	1.019	0.967601
RHBDF1	1.009	0.996	1.022	0.967601
CACNA2D2	1.023	1.002	1.044	0.967601
TSR3	1.005	0.999	1.011	0.967601
SYPL1	0.999	0.998	1	0.967601
SS18L2	0.98	0.952	1.01	0.967601
MAPK8IP2	1.009	0.997	1.021	0.967601
RHOBTB2	1.009	0.998	1.02	0.967601
TENM1	0.929	0.855	1.01	0.967601
PAX7	1.028	0.997	1.059	0.967601
IYD	0.866	0.7	1.072	0.967601
POMT2	0.971	0.93	1.013	0.967601
CD9	1	0.999	1	0.967601
SLC6A13	1.111	0.95	1.3	0.967601
IDS	1.071	0.985	1.164	0.967601
CD4	1.003	0.999	1.006	0.967601
LRRC23	0.983	0.963	1.004	0.967601
TTC19	1.015	0.999	1.03	0.967601
GABRA3	1.012	0.995	1.029	0.967601
PRICKLE3	0.989	0.974	1.005	0.967601
NR1H4	1.398	0.889	2.198	0.967601
MVP	1.003	0.999	1.006	0.967601
ANGEL1	0.973	0.947	1	0.967601
DNASE1L1	1.047	1.006	1.089	0.967601
HEBP1	0.992	0.982	1.002	0.967601
MAMLD1	1.042	0.98	1.108	0.967601
MTMR11	0.992	0.98	1.004	0.967601
NUDCD3	1.007	0.997	1.018	0.967601
SLC11A1	1.021	1.002	1.04	0.967601
ZNF582	1.142	0.997	1.309	0.967601
VSIG2	1.002	1	1.004	0.967601
SLC7A9	1.044	0.986	1.106	0.967601
SPAST	0.99	0.976	1.005	0.967601
OSBPL5	1.015	0.995	1.035	0.967601
CPS1	1.003	1	1.006	0.967601
FHL1	1.007	0.997	1.016	0.967601
SLC45A4	1.018	0.998	1.039	0.967601
ZNF839	0.953	0.889	1.023	0.967601
GRAMD1B	1.037	1.001	1.073	0.967601
NDUFS1	1.012	0.996	1.029	0.967601
ERP44	1.007	1	1.014	0.967601
DEF6	0.99	0.98	1	0.967601
PHF20	1.016	0.999	1.033	0.967601
PRKCH	0.976	0.949	1.004	0.967601
TNFRSF1B	1.005	1	1.01	0.967601
POU2F2	1.031	0.993	1.07	0.967601
SLC39A9	0.994	0.985	1.002	0.967601
IBSP	1.019	1.002	1.037	0.967601
GRN	1.001	1	1.001	0.967601
ARHGAP31	1.019	0.995	1.043	0.967601
CENPQ	0.99	0.976	1.005	0.967601
ARID4A	0.964	0.916	1.015	0.967601
CHPF2	1.005	0.999	1.01	0.967601
GAB2	1.004	0.999	1.009	0.967601
ATP6V0A1	1.009	0.997	1.021	0.967601
PIAS1	1.027	0.987	1.069	0.967601
MAP2K3	1.006	1	1.013	0.967601
ADSS2	0.996	0.991	1.001	0.967601
STAP1	1.022	0.99	1.055	0.967601
FLT4	1.059	1.006	1.114	0.967601
MFAP3	1.039	0.992	1.089	0.967601
EDC4	1.01	0.996	1.024	0.967601
DNAH5	1.024	0.993	1.055	0.967601
ZFYVE16	1.054	0.985	1.128	0.967601
SLC66A1	1.013	0.997	1.03	0.967601
CTNS	1.039	1.002	1.078	0.967601
RAB27B	1.01	0.995	1.025	0.967601
PARP3	1.009	0.996	1.022	0.967601
TDP1	0.969	0.94	0.999	0.967601
C2orf83	3.129	0.948	10.325	0.967601
ZPBP	1.821	0.742	4.471	0.967601
ADAM28	0.98	0.955	1.006	0.967601
DCUN1D1	0.997	0.994	1.001	0.967601
CTNNA1	1.002	0.999	1.006	0.967601
HSPA5	1	1	1.001	0.967601
GPM6B	0.976	0.946	1.006	0.967601
CP	1.001	1	1.003	0.967601
XK	0.96	0.919	1.003	0.967601
MAP4	1.006	0.998	1.014	0.967601
ROS1	1.009	0.998	1.021	0.967601
TSPAN17	1.008	0.998	1.019	0.967601
CLPTM1L	1.002	1	1.005	0.967601
HEXB	1.004	0.999	1.009	0.967601
LAMC3	1.02	0.995	1.046	0.967601
TNIP3	0.98	0.953	1.008	0.967601
PLEKHA5	0.982	0.964	1	0.967601
FSTL4	1.011	0.997	1.026	0.967601
AP5M1	0.968	0.924	1.014	0.967601
KCNQ1	1.016	1	1.032	0.967601
PHPT1	1.003	0.999	1.007	0.967601
SYNE2	0.979	0.961	0.998	0.967601
ATP9A	1.008	1.001	1.014	0.967601
SPO11	2.194	0.843	5.713	0.967601
RELT	1.036	0.987	1.088	0.967601
FAM114A2	1.051	0.995	1.111	0.967601
CCDC85A	1.263	1.013	1.574	0.967601
F7	1.138	1.011	1.282	0.967601
RASGRF1	1.064	1.007	1.125	0.967601
ATP2B4	1.003	0.999	1.007	0.967601
TBXAS1	1.025	0.999	1.051	0.967601
TARBP1	0.991	0.98	1.003	0.967601
OGFR	1.006	0.997	1.016	0.967601
CREB3L3	1.609	1.074	2.41	0.967601
SPAG4	1.008	0.999	1.018	0.967601
DGAT2	1.021	0.993	1.051	0.967601
ELMO2	1.019	1.001	1.036	0.967601
AHRR	2.81	1.029	7.676	0.967601
INTS13	0.995	0.989	1.002	0.967601
CCN5	1.026	0.989	1.063	0.967601
HIPK2	1.008	0.998	1.018	0.967601
SNX24	1.018	0.997	1.039	0.967601
SBNO2	1.006	1	1.012	0.967601
UHRF1BP1	0.973	0.947	1	0.967601
OAT	0.998	0.995	1.001	0.967601
ADAT1	1.015	0.995	1.034	0.967601
MAP2K4	1.014	0.994	1.033	0.967601
GSTO2	0.977	0.947	1.007	0.967601
FAM107B	1.007	0.998	1.015	0.967601
TIE1	1.023	0.997	1.05	0.967601
ELOVL1	1.003	1	1.006	0.967601
SPI1	1.004	0.999	1.009	0.967601
CLDN18	1.002	0.999	1.005	0.967601
ATXN3	0.961	0.907	1.018	0.967601
ISOC1	1.006	0.997	1.015	0.967601
MSANTD3	1.01	0.998	1.022	0.967601
ACSM2B	3.452	0.847	14.061	0.967601
ZFAT	0.977	0.949	1.006	0.967601
KLF6	1.003	1	1.006	0.967601
PRKCZ	1.034	0.994	1.075	0.967601
ROCK1	1.01	0.996	1.025	0.967601
IFI35	1.003	0.999	1.008	0.967601
INPP5A	1.017	0.995	1.039	0.967601
GPKOW	0.992	0.983	1.002	0.967601
TRPC7	2.403	0.954	6.054	0.967601
KCNAB2	1.045	0.993	1.099	0.967601
FUNDC1	0.993	0.985	1.002	0.967601
TMEM260	0.971	0.935	1.007	0.967601
SMG6	1.031	0.991	1.074	0.967601
FSTL3	1.002	0.999	1.005	0.967601
FRMPD1	1.078	0.973	1.193	0.967601
GBA2	1.006	0.999	1.013	0.967601
NDST1	1.006	0.998	1.014	0.967601
PTPN21	1.038	1.001	1.077	0.967601
TRPM5	1.012	0.995	1.029	0.967601
MGAT4A	1.012	0.996	1.028	0.967601
RPL31	0.999	0.998	1	0.967601
WDR1	1.002	0.999	1.005	0.967601
LMCD1	1.016	0.992	1.039	0.967601
HLTF	1.009	0.998	1.02	0.967601
SPP2	1.262	0.909	1.752	0.967601
LNX1	0.986	0.966	1.006	0.967601
AFF4	1.009	0.996	1.022	0.967601
CHFR	1.053	0.994	1.115	0.967601
NFATC3	1.024	0.994	1.053	0.967601
FBXW11	1.012	0.996	1.027	0.967601
SCARB1	1.009	0.997	1.021	0.967601
CYP2W1	1.005	1	1.011	0.967601
CLCN4	1.04	0.996	1.086	0.967601
CD5L	1.532	1.021	2.299	0.967601
CDHR2	1.226	0.942	1.594	0.967601
ATP2A3	1.005	0.998	1.012	0.967601
LMAN1	1.002	0.999	1.005	0.967601
NOX3	2.395	0.829	6.925	0.967601
ENO1	1	1	1	0.967601
TXK	1.186	0.968	1.454	0.967601
FGF4	1.009	0.999	1.018	0.967601
ZNF37A	0.959	0.903	1.018	0.967601
MOCOS	1.01	1	1.021	0.967601
BCAP29	0.403	0.169	0.962	0.967601
TUBA3D	1.067	0.994	1.146	0.967601
EXOSC7	0.987	0.969	1.006	0.967601
REXO2	0.986	0.97	1.003	0.967601
PTPN23	1.011	0.998	1.025	0.967601
GPATCH1	1.019	0.994	1.045	0.967601
ICAM3	1.082	0.983	1.191	0.967601
MBNL3	1.024	0.991	1.058	0.967601
RAP1GAP	1.008	0.999	1.017	0.967601
CTTNBP2	0.974	0.939	1.011	0.967601
IL4R	1.005	1	1.009	0.967601
APBB1IP	1.021	0.998	1.044	0.967601
CAPZB	1.009	0.996	1.021	0.967601
FGFR1	0.996	0.99	1.001	0.967601
PIAS2	1.033	0.994	1.073	0.967601
UBE2K	1.005	0.999	1.012	0.967601
PIK3C3	1.038	0.997	1.081	0.967601
GNB1	1.001	1	1.003	0.967601
MLLT10	0.974	0.944	1.006	0.967601
ITCH	1.009	0.996	1.024	0.967601
TP53INP2	1.005	0.998	1.012	0.967601
TOLLIP	1.007	0.998	1.017	0.967601
OSBPL6	1.06	1.003	1.121	0.967601
TNS1	1.007	0.999	1.015	0.967601
DUSP13	0.959	0.9	1.021	0.967601
AFM	2.113	1.096	4.076	0.967601
PGM1	1.003	0.999	1.007	0.967601
PTPRH	0.988	0.97	1.006	0.967601
SLC4A4	1.045	1	1.091	0.967601
CPB2	1.184	0.999	1.404	0.967601
CLDND1	0.997	0.993	1.001	0.967601
AP4E1	1.032	0.985	1.081	0.967601
COL4A4	1.027	0.995	1.06	0.967601
EXD2	0.978	0.954	1.002	0.967601
MEF2C	1.049	0.99	1.111	0.967601
DELE1	1.015	0.995	1.035	0.967601
SLC13A1	2.941	1.059	8.166	0.967601
CADPS2	1.019	1.003	1.036	0.967601
IL12RB2	0.978	0.955	1.002	0.967601
STRADB	0.983	0.962	1.004	0.967601
TRPM3	1.211	0.99	1.482	0.967601
TUT7	1.015	0.994	1.037	0.967601
PLOD1	1.001	1	1.002	0.967601
RRAGB	0.987	0.971	1.004	0.967601
SLC27A5	0.906	0.826	0.993	0.967601
ZNF264	1.029	0.993	1.066	0.967601
SSH1	1.019	0.998	1.042	0.967601
FAM234B	0.983	0.962	1.004	0.967601
SLCO1A2	0.945	0.872	1.025	0.967601
NCOA1	1.008	0.997	1.019	0.967601
AK6	0.973	0.934	1.013	0.967601
MYNN	0.986	0.972	1.001	0.967601
SLC25A24	1.012	0.995	1.029	0.967601
CTTN	1.001	1	1.001	0.967601
MTIF2	0.993	0.985	1.001	0.967601
DDHD2	0.993	0.982	1.003	0.967601
TTC39A	1.022	0.991	1.053	0.967601
EPS15	1.012	0.995	1.029	0.967601
MGST2	0.993	0.983	1.002	0.967601
POMGNT1	1.006	0.998	1.013	0.967601
SNX10	1.011	0.997	1.024	0.967601
LAT2	1.02	0.996	1.044	0.967601
TRIP6	0.998	0.996	1.001	0.967601
CETP	1.089	0.998	1.188	0.967601
SH3BP2	1.016	0.997	1.035	0.967601
RTRAF	0.992	0.981	1.002	0.967601
GMCL1	0.99	0.978	1.002	0.967601
CASS4	1.069	0.991	1.153	0.967601
DDX18	0.994	0.986	1.001	0.967601
REM1	1.026	0.991	1.062	0.967601
C3orf18	1.034	0.985	1.085	0.967601
DEFB127	2.255	0.836	6.081	0.967601
PPP1R13B	0.987	0.97	1.004	0.967601
NSFL1C	1.004	0.998	1.009	0.967601
EBF4	1.009	0.996	1.023	0.967601
MAVS	1.007	0.998	1.015	0.967601
F11	1.379	1.023	1.859	0.967601
P2RX7	1.077	0.996	1.164	0.967601
RBBP9	1.009	0.997	1.02	0.967601
PXN	1.007	0.998	1.017	0.967601
FXYD5	1.001	1	1.003	0.967601
GRAMD1A	1.009	1.001	1.017	0.967601
CMTM1	1.093	0.971	1.23	0.967601
GANAB	1.001	1	1.002	0.967601
GMIP	1.01	0.997	1.023	0.967601
MLF2	0.999	0.998	1	0.967601
DDX24	0.991	0.982	0.999	0.967601
NECAP1	0.974	0.943	1.006	0.967601
PAPOLA	0.994	0.986	1.003	0.967601
NUDC	1.002	0.999	1.006	0.967601
MAEA	1.018	0.998	1.038	0.967601
STRN4	1.007	0.998	1.015	0.967601
IRAK3	1.028	0.998	1.058	0.967601
MUL1	1.009	1	1.019	0.967601
FETUB	0.991	0.982	0.999	0.967601
GOLGA3	1.008	0.997	1.02	0.967601
PITPNM2	1.024	0.995	1.053	0.967601
NLRC4	1.078	0.981	1.184	0.967601
LAMB4	1.084	1.011	1.162	0.967601
SEL1L3	1.002	0.999	1.006	0.967601
ALKBH5	1.003	0.999	1.006	0.967601
APOH	1.035	0.997	1.074	0.967601
SPAG7	1.01	1.001	1.02	0.967601
CPA1	1.671	1.024	2.727	0.967601
CD200	0.996	0.99	1.002	0.967601
CEBPE	0.735	0.485	1.116	0.967601
OSGEP	0.977	0.954	1.001	0.967601
RNF31	0.607	0.303	1.217	0.967601
SCFD1	0.941	0.867	1.021	0.967601
G2E3	0.963	0.927	1	0.967601
HNRNPC	0.998	0.995	1.001	0.967601
SUPT16H	0.996	0.992	1.001	0.967601
TOX4	0.99	0.977	1.003	0.967601
PHGDH	1.001	1	1.002	0.967601
AGO1	1.014	0.996	1.031	0.967601
DPYSL2	1.005	1.001	1.009	0.967601
SEC22C	1.028	0.99	1.066	0.967601
XYLB	0.943	0.885	1.005	0.967601
OR1I1	6.809	0.551	84.193	0.967601
DHPS	0.934	0.862	1.013	0.967601
HOOK2	0.992	0.981	1.002	0.967601
NXPE1	2.502	0.923	6.779	0.967601
EPB41L4B	0.986	0.966	1.007	0.967601
SH2D3C	1.018	0.993	1.044	0.967601
SEMA4G	1.047	0.981	1.116	0.967601
TDRD1	0.948	0.885	1.015	0.967601
SRPK1	0.988	0.972	1.005	0.967601
PGC	1.003	1	1.005	0.967601
TMEM14A	0.999	0.998	1	0.967601
DSP	1	0.999	1	0.967601
JAK2	1.013	1.001	1.025	0.967601
ABL1	1.006	0.999	1.013	0.967601
ACOT7	1.003	0.999	1.007	0.967601
SH3GLB1	1.008	0.999	1.018	0.967601
OCEL1	1.009	0.998	1.021	0.967601
PRKY	0.984	0.962	1.007	0.967601
MARCHF2	1.004	0.998	1.01	0.967601
MTAP	0.972	0.937	1.008	0.967601
MISP	1.004	0.999	1.01	0.967601
CDHR5	1.282	1.021	1.608	0.967601
IZUMO4	0.952	0.902	1.005	0.967601
MADCAM1	0.786	0.579	1.068	0.967601
RANBP1	0.998	0.994	1.001	0.967601
SERPIND1	1.005	0.998	1.012	0.967601
SLC7A4	1.02	1.001	1.039	0.967601
OSM	1.022	1.001	1.044	0.967601
GGT5	1.008	0.996	1.02	0.967601
YPEL1	1.045	0.998	1.094	0.967601
CYTH4	1.024	1.003	1.046	0.967601
CRYBB1	1.101	0.968	1.253	0.967601
SNU13	0.998	0.995	1.001	0.967601
POLR2F	0.987	0.969	1.005	0.967601
DEPDC5	0.914	0.802	1.041	0.967601
TTC28	0.961	0.92	1.003	0.967601
HSCB	0.987	0.972	1.001	0.967601
RTCB	0.998	0.995	1.001	0.967601
MIOX	0.928	0.853	1.011	0.967601
PDGFB	1.004	0.998	1.01	0.967601
SYNGR1	0.986	0.967	1.007	0.967601
PNPLA5	1.132	0.942	1.359	0.967601
SAMM50	0.988	0.973	1.004	0.967601
EIF3D	0.999	0.997	1	0.967601
SGSM3	0.647	0.371	1.127	0.967601
IFT27	0.974	0.937	1.012	0.967601
SLC25A17	0.984	0.968	1	0.967601
UPK3A	0.865	0.742	1.007	0.967601
RBX1	0.996	0.991	1.001	0.967601
PHF5A	0.997	0.994	1	0.967601
FKBP3	0.993	0.986	1.001	0.967601
SDR39U1	0.935	0.856	1.021	0.967601
CTSG	1.032	0.985	1.081	0.967601
PRMT5	0.992	0.98	1.004	0.967601
COCH	0.99	0.979	1.002	0.967601
AP4S1	0.931	0.845	1.024	0.967601
PSMC6	0.991	0.979	1.002	0.967601
DDHD1	0.932	0.856	1.014	0.967601
CNIH1	0.996	0.991	1.001	0.967601
PIGH	0.973	0.943	1.005	0.967601
PSMA3	0.996	0.991	1	0.967601
AHSA1	0.997	0.994	1	0.967601
SPTLC2	0.993	0.982	1.003	0.967601
SNW1	0.994	0.988	1	0.967601
PPM1A	0.979	0.954	1.004	0.967601
SIX4	0.977	0.956	0.998	0.967601
HIF1A	0.998	0.997	1	0.967601
SRSF5	0.996	0.992	1.001	0.967601
DICER1	0.982	0.964	1	0.967601
MTHFD1	0.984	0.964	1.005	0.967601
GSKIP	0.99	0.978	1.003	0.967601
VRK1	0.991	0.981	1.001	0.967601
PAPLN	0.982	0.959	1.005	0.967601
PPP4R3A	0.99	0.982	0.999	0.967601
PSMB5	0.999	0.997	1	0.967601
YY1	0.993	0.985	1.002	0.967601
ACIN1	0.994	0.987	1.001	0.967601
TRIP11	0.972	0.942	1.003	0.967601
APEX1	0.999	0.997	1	0.967601
PABPN1	0.979	0.953	1.006	0.967601
EFS	0.996	0.991	1.001	0.967601
SRP54	0.985	0.968	1.003	0.967601
PSME2	0.998	0.995	1.001	0.967601
BRMS1L	0.972	0.944	1.001	0.967601
TM9SF1	1.094	0.974	1.228	0.967601
SEC23A	0.992	0.98	1.004	0.967601
GMPR2	0.99	0.981	0.999	0.967601
PNN	0.995	0.991	0.999	0.967601
MMP9	1	1	1.001	0.967601
VSX1	1.517	1.028	2.24	0.967601
TRPC4AP	1.004	1	1.007	0.967601
PYGB	1.001	1	1.003	0.967601
ABHD12	1.006	0.999	1.013	0.967601
CD40	1.003	0.999	1.007	0.967601
R3HDML	1.058	0.983	1.139	0.967601
HNF4A	1.114	0.998	1.244	0.967601
NFATC2	1.024	0.995	1.053	0.967601
DNAJC5	1.003	0.999	1.008	0.967601
HRH3	1.293	1.005	1.665	0.967601
BIRC7	1.054	0.974	1.14	0.967601
AVP	1.513	0.82	2.791	0.967601
CHRNA4	1.324	0.883	1.984	0.967601
EEF1A2	1.002	0.999	1.005	0.967601
HM13	1.004	0.999	1.009	0.967601
MYLK2	1.323	0.999	1.752	0.967601
SEC23B	1.007	1.001	1.013	0.967601
PDYN	3.118	0.999	9.733	0.967601
TM9SF4	1.003	1	1.005	0.967601
IDH3B	1.004	1.001	1.008	0.967601
RPRD1B	1.007	0.998	1.016	0.967601
CST9L	1.708	0.893	3.266	0.967601
CST3	1.002	1	1.003	0.967601
CST4	1.009	0.997	1.022	0.967601
SPINT3	1.979	0.787	4.974	0.967601
FAM83D	0.998	0.995	1	0.967601
ACOT8	1.023	0.992	1.054	0.967601
SMAD7	1.016	1.002	1.032	0.967601
LIPG	1.018	0.994	1.042	0.967601
RIOK3	1.003	0.999	1.007	0.967601
ATP1B4	13.456	1.278	141.706	0.967601
BMX	1.023	0.995	1.052	0.967601
SMARCA1	1.003	0.999	1.008	0.967601
PQBP1	0.993	0.985	1.001	0.967601
GATA1	0.614	0.299	1.259	0.967601
UBL4A	1.003	1	1.007	0.967601
TIMP1	1	1	1.001	0.967601
PIN4	0.974	0.941	1.009	0.967601
MAGED2	1.001	1	1.002	0.967601
PBDC1	0.994	0.987	1.002	0.967601
FNDC3A	1.014	0.999	1.028	0.967601
MLNR	1.286	0.917	1.804	0.967601
CAB39L	1.021	0.996	1.047	0.967601
KLF5	0.999	0.998	1	0.967601
STK24	1.011	0.997	1.024	0.967601
FGF9	1.102	0.996	1.219	0.967601
PARP4	1.008	1	1.016	0.967601
FLT1	1.02	0.998	1.042	0.967601
KATNAL1	1.051	0.994	1.11	0.967601
MEDAG	1.012	1.001	1.024	0.967601
MSLN	1	1	1	0.967601
MGRN1	1.011	0.995	1.028	0.967601
MAPK3	1.005	0.998	1.012	0.967601
ELMO3	1.004	1	1.009	0.967601
ACD	1.016	1.001	1.03	0.967601
HAS3	0.999	0.998	1	0.967601
SLC7A6	1.055	0.985	1.131	0.967601
PLA2G15	1.024	1	1.049	0.967601
FA2H	1.004	1	1.007	0.967601
MON1B	1.019	1.001	1.038	0.967601
SEC14L5	0.969	0.925	1.015	0.967601
USP10	1.005	0.999	1.011	0.967601
CRISPLD2	1.006	0.999	1.013	0.967601
SLC7A5	1.001	1	1.001	0.967601
FBXO31	1.031	0.996	1.066	0.967601
RHBDL1	0.982	0.958	1.007	0.967601
PIEZO1	1.005	0.998	1.012	0.967601
KAT8	0.986	0.967	1.006	0.967601
AQP9	1.016	1.001	1.031	0.967601
TRIP4	1.014	0.996	1.032	0.967601
IGDCC4	1.071	0.979	1.172	0.967601
RAB11A	1.003	0.999	1.007	0.967601
CD276	1.003	0.999	1.007	0.967601
CEMIP	0.996	0.989	1.002	0.967601
EHD4	1.017	1.001	1.032	0.967601
VPS18	1.01	0.996	1.024	0.967601
RP1	1.122	0.95	1.324	0.967601
RIPK2	1.011	1	1.022	0.967601
JPH1	0.981	0.965	0.998	0.967601
GDAP1	0.913	0.844	0.986	0.967601
EIF3E	0.992	0.98	1.004	0.967601
EMC2	0.991	0.978	1.004	0.967601
ESRP1	0.998	0.994	1.001	0.967601
SNX16	0.973	0.937	1.01	0.967601
SQLE	1.002	1	1.005	0.967601
ASAH1	1.008	0.998	1.019	0.967601
KCNN4	1.005	1	1.011	0.967601
NUCB1	1.002	1	1.003	0.967601
RELB	1.002	1	1.005	0.967601
LIN7B	0.976	0.941	1.012	0.967601
PPP1R37	1.01	0.997	1.023	0.967601
ARHGEF18	1.016	0.998	1.034	0.967601
CD37	1.006	0.997	1.016	0.967601
AMH	0.976	0.944	1.009	0.967601
TRMT1	0.992	0.984	1	0.967601
STX10	0.994	0.988	1	0.967601
RETN	1.028	1.003	1.054	0.967601
CLEC4M	1.475	0.918	2.371	0.967601
TBC1D17	1.012	1	1.023	0.967601
C19orf53	0.999	0.997	1	0.967601
URI1	1.002	0.999	1.005	0.967601
ANKRD27	1.008	1	1.017	0.967601
LGALS13	2.051	0.901	4.672	0.967601
DYRK1B	1.005	1	1.011	0.967601
PLD3	1	1	1.001	0.967601
PRX	1.036	0.996	1.077	0.967601
TBCB	1.003	1	1.007	0.967601
CLIP3	1.008	1	1.017	0.967601
PRKD2	1.007	0.998	1.017	0.967601
PLIN3	1.005	1	1.01	0.967601
CD33	1.059	0.972	1.153	0.967601
NAPA	1.016	0.996	1.036	0.967601
PTPRS	1.004	0.999	1.009	0.967601
CNFN	1.001	1	1.002	0.967601
ZNRF4	7.451	0.512	108.449	0.967601
MEGF8	1.009	0.998	1.02	0.967601
CLEC11A	1.005	0.998	1.013	0.967601
ZNF175	1.075	0.989	1.168	0.967601
SIGLEC5	1.66	1.012	2.724	0.967601
PLPPR2	1.008	0.997	1.019	0.967601
TNPO2	0.995	0.989	1.002	0.967601
WDR83OS	0.019	0	2.033	0.967601
LILRB5	1.055	0.98	1.136	0.967601
SLC5A5	1.017	0.997	1.038	0.967601
ELL	1.018	0.991	1.046	0.967601
COMP	1.004	1	1.008	0.967601
UPK1A	1.003	1	1.006	0.967601
ZNF85	1.038	0.985	1.094	0.967601
ETHE1	0.994	0.987	1.001	0.967601
DNAJC2	0.987	0.969	1.005	0.967601
ZC3HAV1	1.013	0.995	1.03	0.967601
NPVF	2.234	0.747	6.683	0.967601
TFEC	1.038	0.983	1.096	0.967601
CAV1	1.001	1	1.002	0.967601
HOXA3	1.054	1.001	1.108	0.967601
CHN2	2.832	0.62	12.927	0.967601
STX1A	1.013	0.993	1.034	0.967601
NOD1	1.069	1.008	1.135	0.967601
MINDY4	0.528	0.237	1.177	0.967601
SPAM1	2.52	0.711	8.934	0.967601
SERPINE1	1	1	1.001	0.967601
MOGAT3	2.322	0.787	6.847	0.967601
PLOD3	1.002	0.999	1.006	0.967601
GLI3	1.018	0.994	1.042	0.967601
GCK	1.106	0.963	1.269	0.967601
GALNTL5	2.432	0.984	6.01	0.967601
ENG	1.003	0.999	1.006	0.967601
TBC1D13	1.008	0.996	1.02	0.967601
DOCK8	1.022	0.992	1.054	0.967601
CREB3	1.001	1	1.003	0.967601
RGP1	1.012	1.001	1.023	0.967601
LHX3	1.028	0.986	1.071	0.967601
RAPGEF1	1.005	1	1.011	0.967601
ABCA2	1.012	1	1.025	0.967601
DVL1	1.005	1	1.01	0.967601
GATA3	1.001	1	1.003	0.967601
ATRNL1	1.049	0.984	1.118	0.967601
MAPK8	1.021	0.999	1.044	0.967601
NSMCE4A	0.986	0.967	1.005	0.967601
UNC5B	1.005	0.998	1.012	0.967601
CDH23	1.058	0.996	1.125	0.967601
VSIR	1.007	0.998	1.017	0.967601
MICU1	1.007	0.997	1.018	0.967601
CCSER2	1.019	0.997	1.042	0.967601
ACTA2	1.002	1	1.004	0.967601
SFXN3	1.009	0.999	1.019	0.967601
NPM3	0.998	0.996	1.001	0.967601
PITX3	0.842	0.67	1.058	0.967601
CPEB3	0.871	0.743	1.02	0.967601
MTPAP	0.973	0.935	1.013	0.967601
GLRX3	0.995	0.988	1.001	0.967601
XPNPEP1	0.99	0.976	1.005	0.967601
ZMIZ1	1.005	0.999	1.01	0.967601
TSPAN14	1.009	0.999	1.02	0.967601
KRT23	1.004	1	1.007	0.967601
CRYBA1	1.688	1.073	2.657	0.967601
TUBD1	0.974	0.948	1	0.967601
DRG2	1.024	0.99	1.058	0.967601
FTSJ3	0.994	0.986	1.002	0.967601
AKAP10	1.015	0.997	1.033	0.967601
CCL7	1.031	0.998	1.066	0.967601
CCL2	1.001	1	1.003	0.967601
CCL8	1.008	1.001	1.015	0.967601
KRT32	1.067	0.981	1.159	0.967601
SGCA	1.024	0.995	1.055	0.967601
MRPL27	0.992	0.981	1.003	0.967601
RND2	0.985	0.967	1.004	0.967601
HLF	0.983	0.961	1.006	0.967601
MAP2K6	0.959	0.9	1.021	0.967601
NAT9	0.989	0.975	1.004	0.967601
LAMTOR3	0.989	0.975	1.003	0.967601
NDUFC1	0.986	0.973	0.999	0.967601
INPP4B	1.034	0.994	1.075	0.967601
ANXA10	1.002	0.999	1.006	0.967601
AADAT	0.983	0.959	1.006	0.967601
TBC1D19	1.034	0.994	1.076	0.967601
RAPGEF2	1.034	0.993	1.077	0.967601
CRYAB	0.998	0.995	1.001	0.967601
ZBTB16	1.039	0.991	1.089	0.967601
OSBP	1.008	0.998	1.017	0.967601
UNC93B1	1.006	0.999	1.014	0.967601
KMT5B	1.008	0.997	1.019	0.967601
FOXRED1	0.985	0.962	1.008	0.967601
MS4A4A	1.007	0.997	1.018	0.967601
ST3GAL4	1.009	0.998	1.02	0.967601
CPT1A	1.002	0.999	1.006	0.967601
HPX	1.161	1.005	1.342	0.967601
PANX1	1.005	0.998	1.011	0.967601
BIRC2	1.003	0.999	1.006	0.967601
UPK2	1.001	1	1.003	0.967601
KIAA1549L	1.012	0.996	1.029	0.967601
PDHX	0.99	0.979	1.002	0.967601
COMMD9	1.017	0.996	1.038	0.967601
SCGB2A2	1.01	0.997	1.024	0.967601
CD81	1.003	1	1.005	0.967601
SLC35F2	1.006	0.999	1.012	0.967601
CHKA	1.005	1	1.011	0.967601
EXPH5	0.968	0.928	1.01	0.967601
VWF	1.004	0.999	1.009	0.967601
SELPLG	1.007	0.999	1.015	0.967601
DAO	2.098	0.692	6.357	0.967601
KCTD10	1.016	0.996	1.036	0.967601
SLC11A2	0.988	0.973	1.004	0.967601
MLEC	1.003	0.999	1.008	0.967601
MYF5	2.403	0.808	7.142	0.967601
KRT18	1	1	1.001	0.967601
TNS2	1.015	0.997	1.034	0.967601
ELK3	1.006	0.997	1.014	0.967601
FGF6	2.097	0.765	5.748	0.967601
AKAP3	0.915	0.808	1.036	0.967601
GPRC5D	0.988	0.977	0.998	0.967601
LTBR	0.998	0.995	1.001	0.967601
STX2	1.02	0.992	1.048	0.967601
RAB5B	1.004	0.999	1.01	0.967601
ACRBP	0.952	0.89	1.019	0.967601
COPS7A	0.997	0.993	1	0.967601
GNB3	0.897	0.8	1.006	0.967601
CDCA3	0.985	0.969	1.002	0.967601
GNPTAB	1.009	0.997	1.02	0.967601
ATN1	0.999	0.996	1.001	0.967601
NANOG	1.432	1.056	1.942	0.967601
LDHB	0.98	0.962	0.999	0.967601
PRKAB1	1.014	0.998	1.029	0.967601
ST8SIA1	0.91	0.796	1.04	0.967601
C2CD5	0.991	0.977	1.004	0.967601
PAK1IP1	0.995	0.99	1.001	0.967601
SERINC1	1.002	0.999	1.004	0.967601
FANCE	0.992	0.983	1.001	0.967601
SLC26A8	2.259	0.706	7.232	0.967601
STK38	0.997	0.993	1.001	0.967601
SRSF3	0.997	0.993	1.001	0.967601
CILK1	0.994	0.985	1.002	0.967601
TREML2	1.05	1.003	1.099	0.967601
FHL5	1.07	0.991	1.155	0.967601
GPLD1	0.936	0.849	1.031	0.967601
CRYBG1	1.004	1	1.007	0.967601
EYA4	1.032	0.987	1.079	0.967601
NR2E1	1.061	0.983	1.146	0.967601
SLC17A2	1.965	0.824	4.685	0.967601
OR12D3	3.184	0.584	17.353	0.967601
CUTA	0.998	0.995	1	0.967601
BYSL	0.996	0.99	1.002	0.967601
DUSP22	1.011	0.995	1.028	0.967601
CLIC5	1.017	0.995	1.04	0.967601
HARS2	1.014	0.996	1.033	0.967601
HMGCR	1.008	1	1.016	0.967601
CERT1	1.051	0.993	1.112	0.967601
FAF2	1.011	1	1.021	0.967601
HAVCR1	1.078	0.98	1.186	0.967601
RASGRF2	1.03	0.988	1.074	0.967601
CDH6	1.011	0.998	1.025	0.967601
SLC27A6	1.01	0.995	1.026	0.967601
PDE4D	1.046	1.001	1.094	0.967601
BRIX1	0.994	0.986	1.002	0.967601
SLC12A7	1.002	0.999	1.004	0.967601
RAD50	1.302	0.884	1.919	0.967601
PCDH12	1.034	0.998	1.072	0.967601
TRAPPC13	0.968	0.923	1.015	0.967601
SEC24A	1.019	0.994	1.045	0.967601
RARS1	1.007	0.999	1.016	0.967601
WWC1	1.012	0.997	1.027	0.967601
STC2	1.003	0.999	1.006	0.967601
HRH2	1.005	0.998	1.012	0.967601
ACTR8	1.027	0.992	1.064	0.967601
KNG1	1.369	0.928	2.018	0.967601
BCL6	0.995	0.988	1.001	0.967601
HGD	1.006	0.997	1.015	0.967601
NPHP3	0.939	0.854	1.032	0.967601
KPNA1	1.008	0.996	1.02	0.967601
PCCB	0.992	0.981	1.002	0.967601
RBP2	1.051	0.981	1.126	0.967601
RNF7	0.997	0.993	1.001	0.967601
TFDP2	1.008	0.996	1.02	0.967601
PDCD10	0.997	0.994	1	0.967601
NPRL2	0.975	0.943	1.008	0.967601
IFT57	1.005	0.998	1.011	0.967601
MORC1	1.035	0.997	1.074	0.967601
KLHL18	1.049	0.984	1.119	0.967601
MRPL3	0.998	0.996	1.001	0.967601
CISH	1.014	0.994	1.036	0.967601
COMMD2	0.994	0.987	1.002	0.967601
ABCC5	0.999	0.998	1	0.967601
ABHD14B	0.992	0.982	1.002	0.967601
ABHD14A-ACY1	0.001	0	3.413	0.967601
ZBTB47	1.044	1.001	1.089	0.967601
TNNC1	1.006	0.997	1.016	0.967601
FOXP1	1.114	0.981	1.266	0.967601
STEAP3	1.003	0.998	1.008	0.967601
SF3B6	0.998	0.997	1	0.967601
GPD2	0.993	0.985	1.001	0.967601
CENPA	0.99	0.978	1.003	0.967601
ITGA4	1.031	1	1.064	0.967601
PPM1G	0.998	0.995	1.001	0.967601
PDE1A	1.017	0.997	1.038	0.967601
PCSK4	0.948	0.886	1.014	0.967601
PCGF1	0.989	0.977	1.002	0.967601
CLIP4	0.993	0.983	1.003	0.967601
AUP1	0.998	0.996	1	0.967601
POLE4	0.994	0.988	1	0.967601
WDR75	0.993	0.983	1.003	0.967601
PAPOLG	1.02	0.992	1.049	0.967601
DNAH6	1.077	0.967	1.201	0.967601
IGFBP5	1	0.999	1	0.967601
ST3GAL5	1.04	0.995	1.087	0.967601
CHST10	1.006	0.997	1.014	0.967601
IL18R1	0.972	0.931	1.014	0.967601
MLPH	1.007	0.998	1.016	0.967601
HPCAL1	1.008	0.997	1.02	0.967601
ODC1	1	0.999	1	0.967601
NOL10	0.99	0.977	1.004	0.967601
RMDN2	0.911	0.817	1.015	0.967601
KYNU	1.009	0.996	1.022	0.967601
COX7A2L	0.995	0.99	1.001	0.967601
RND3	0.998	0.995	1.001	0.967601
ARID3A	1.016	0.998	1.034	0.967601
MARK1	0.978	0.949	1.009	0.967601
QSOX1	1.003	1	1.006	0.967601
ELAPOR1	0.994	0.987	1.001	0.967601
OPRD1	1.148	0.96	1.374	0.967601
NCF2	1.004	0.999	1.01	0.967601
PDC	1.089	1.004	1.181	0.967601
PLEKHM2	1.005	0.999	1.011	0.967601
TFAP2E	0.961	0.911	1.014	0.967601
NR5A2	1.16	0.94	1.433	0.967601
KIF21B	1.052	0.986	1.123	0.967601
MAP7D1	1.004	0.999	1.008	0.967601
HAO2	2.649	0.834	8.413	0.967601
AKT3	1.014	0.998	1.031	0.967601
ADGRL2	1.024	0.996	1.053	0.967601
CTBS	1.195	0.997	1.432	0.967601
RGS4	1.008	0.997	1.019	0.967601
GBP3	1.008	0.996	1.019	0.967601
KIF17	1.045	0.986	1.109	0.967601
GALE	1.008	1	1.015	0.967601
PRDX1	1	1	1	0.967601
HSD11B1	1.01	0.996	1.024	0.967601
SERPINC1	1.168	1.015	1.343	0.967601
SLC35A3	0.957	0.911	1.006	0.967601
DHDDS	1.015	0.994	1.036	0.967601
PROX1	1.014	0.995	1.033	0.967601
RPA2	1.003	0.998	1.008	0.967601
STX12	1.011	1	1.022	0.967601
OSBPL9	1.014	0.998	1.03	0.967601
CTSD	1.001	1	1.002	0.967601
IFT46	0.988	0.971	1.005	0.967601
RPS25	1	0.999	1	0.967601
TTR	1.075	0.968	1.195	0.967601
HMGN3	0.998	0.996	1	0.967601
RAB32	1.002	1	1.005	0.967601
ALDH8A1	1.005	0.999	1.011	0.967601
SGK1	0.999	0.997	1	0.967601
ARG1	1.017	0.999	1.035	0.967601
TCF21	1.078	0.991	1.171	0.967601
ZNF430	1.03	0.989	1.073	0.967601
SPP1	1	1	1	0.967601
STBD1	1.16	0.978	1.377	0.967601
MFSD1	0.995	0.988	1.002	0.967601
LDAH	0.986	0.968	1.003	0.967601
CCND2	0.997	0.993	1	0.967601
FGF23	3.31	0.969	11.306	0.967601
NDUFB3	0.997	0.994	1	0.967601
GDA	0.985	0.972	0.999	0.967601
CCDC92	1.017	0.992	1.043	0.967601
PTPA	1.004	0.998	1.009	0.967601
TRIM32	1.014	0.997	1.03	0.967601
BSPRY	1.004	0.998	1.01	0.967601
RBM18	1.015	0.996	1.034	0.967601
NR4A3	1.012	0.998	1.027	0.967601
GALNT12	1.016	0.994	1.037	0.967601
DENND1A	1.028	0.998	1.059	0.967601
DCAF4	0.971	0.937	1.005	0.967601
FCF1	0.987	0.975	0.999	0.967601
NEK9	0.986	0.967	1.007	0.967601
IFT43	0.975	0.948	1.003	0.967601
ACOT2	0.987	0.971	1.003	0.967601
LTBP2	1.002	0.999	1.006	0.967601
MLH3	0.936	0.883	0.993	0.967601
FLVCR2	1.035	0.993	1.078	0.967601
DLST	0.995	0.989	1.001	0.967601
RBM25	0.986	0.973	1	0.967601
EIF2B2	0.973	0.947	1.001	0.967601
NRDE2	0.884	0.778	1.004	0.967601
COQ6	0.874	0.744	1.027	0.967601
KLHL29	1.031	0.988	1.075	0.967601
ATL2	0.995	0.989	1.001	0.967601
FAM98A	0.988	0.973	1.004	0.967601
CNRIP1	1.022	0.993	1.052	0.967601
TECTB	4.199	0.913	19.306	0.967601
PPP1R3C	1.011	0.996	1.027	0.967601
C10orf88	0.967	0.922	1.015	0.967601
HELLS	0.971	0.943	1.001	0.967601
DUSP1	1	1	1.001	0.967601
INSL6	1.154	1.02	1.305	0.967601
INSL4	1.024	0.995	1.055	0.967601
MLANA	1.523	0.913	2.54	0.967601
MYCT1	1.033	0.992	1.075	0.967601
MAGEB4	4.035	1.242	13.115	0.967601
WDR55	1.041	1.002	1.082	0.967601
ARAP3	1.019	1.001	1.038	0.967601
PCDHB14	0.97	0.942	1	0.967601
TEX11	1.063	0.977	1.157	0.967601
KIAA1217	0.993	0.985	1.002	0.967601
SERP1	0.998	0.995	1	0.967601
ZFP30	1.032	0.992	1.073	0.967601
GLT8D2	1.004	0.999	1.01	0.967601
DUSP4	1.006	1.001	1.012	0.967601
TNFRSF8	1.038	0.999	1.079	0.967601
RDH10	0.998	0.995	1	0.967601
TBX4	1.02	0.995	1.046	0.967601
PRB2	0.685	0.408	1.15	0.967601
KCNJ8	1.018	0.997	1.038	0.967601
TAS2R7	2.429	0.733	8.045	0.967601
BCL2L14	0.924	0.838	1.019	0.967601
TAS2R9	4.37	0.579	32.998	0.967601
CSTA	1	0.999	1	0.967601
B4GALT4	0.995	0.989	1	0.967601
CCR2	1.04	0.993	1.09	0.967601
POLR3GL	0.978	0.953	1.003	0.967601
TNFSF10	0.999	0.999	1	0.967601
SV2C	0.574	0.25	1.318	0.967601
PLG	1.681	0.945	2.991	0.967601
KIAA1191	1.005	0.999	1.011	0.967601
ANXA11	1.005	1.001	1.009	0.967601
SLC66A2	1.008	0.998	1.018	0.967601
BBS9	1.064	0.994	1.138	0.967601
NXPH1	1.575	0.895	2.773	0.967601
HOXA7	1.129	1.017	1.252	0.967601
TWIST1	0.994	0.986	1.002	0.967601
CLTA	1.001	1	1.002	0.967601
SPINK4	1.107	0.98	1.251	0.967601
CNTFR	1.011	0.997	1.025	0.967601
KIAA1549	1.013	0.994	1.032	0.967601
SFTPA1	1	1	1	0.967601
EGR2	1.007	1	1.014	0.967601
P4HA1	1.001	1	1.003	0.967601
BHLHE41	1.004	0.999	1.01	0.967601
ITPR2	1.018	0.994	1.042	0.967601
NECAB1	1.063	0.992	1.138	0.967601
TRIR	0.999	0.997	1	0.967601
ADGRE5	1.008	1	1.015	0.967601
WDR83	0.931	0.847	1.024	0.967601
MMP19	1.013	1.002	1.024	0.967601
NFE2	1.028	0.99	1.068	0.967601
KBTBD4	1.049	0.983	1.12	0.967601
AMD1	0.989	0.977	1.001	0.967601
MAGEA9	1.033	0.989	1.079	0.967601
ATXN3L	959.759	1.547	595569	0.967601
ACVR1C	0.937	0.87	1.008	0.967601
B9D2	1.022	0.994	1.051	0.967601
COQ8B	1.021	1.002	1.039	0.967601
C4BPB	1.019	0.991	1.048	0.967601
MXD4	1.011	0.997	1.024	0.967601
ACSL3	1.004	0.998	1.01	0.967601
SLC12A4	1.014	1	1.029	0.967601
FAM209A	2.028	0.84	4.895	0.967601
TTPAL	1.013	0.996	1.03	0.967601
SLC12A5	1.068	0.975	1.17	0.967601
SDC4	1	1	1.001	0.967601
PIGT	1.009	0.999	1.019	0.967601
SEMG2	2.175	0.697	6.791	0.967601
ATP5F1E	0.997	0.994	1.001	0.967601
ZNFX1	1.014	1.001	1.027	0.967601
PTGIS	1.014	1	1.027	0.967601
MOCS3	1.018	0.992	1.045	0.967601
MCEE	0.972	0.942	1.003	0.967601
MPHOSPH10	0.992	0.981	1.004	0.967601
ATP8A1	1.025	0.992	1.059	0.967601
USP22	1.003	0.999	1.006	0.967601
HIF3A	1.014	1.001	1.028	0.967601
CEACAM8	1.656	0.782	3.505	0.967601
F13A1	1.004	1	1.007	0.967601
WRNIP1	0.992	0.986	0.999	0.967601
SNRPC	0.998	0.996	1	0.967601
SLC17A1	2.774	0.661	11.64	0.967601
AL365205.1	0.708	0.457	1.097	0.967601
MED20	0.989	0.977	1.002	0.967601
TBCC	0.994	0.986	1.001	0.967601
SPDEF	1.004	1	1.008	0.967601
GNMT	0.904	0.786	1.038	0.967601
TREM1	1.008	0.999	1.017	0.967601
CDKN1A	1.001	1	1.003	0.967601
GLO1	0.999	0.998	1	0.967601
RIOK1	0.995	0.987	1.002	0.967601
CRISP1	2.959	0.683	12.807	0.967601
GCM2	3.068	1.05	8.967	0.967601
CXCL6	0.998	0.996	1.001	0.967601
MYRF	1.032	0.987	1.08	0.967601
WNT1	1.021	1.003	1.04	0.967601
MT2A	1	1	1.001	0.967601
SEPTIN6	1.007	0.998	1.016	0.967601
DMAC2L	0.944	0.899	0.992	0.967601
MYH2	1.265	1.015	1.576	0.967601
SRMS	1.039	0.994	1.087	0.967601
FNDC11	1.076	0.985	1.175	0.967601
BHLHE23	6.263	0.781	50.257	0.967601
PPDPF	1	1	1.001	0.967601
POLR1B	0.983	0.96	1.006	0.967601
TNFSF9	1.012	0.999	1.025	0.967601
CD70	1.003	0.999	1.007	0.967601
TNFSF14	1.106	0.975	1.255	0.967601
FOSB	1.001	1	1.002	0.967601
OPA3	1.022	0.992	1.054	0.967601
GPCPD1	0.992	0.982	1.002	0.967601
PANK2	1.026	0.998	1.055	0.967601
CD93	1.006	0.999	1.013	0.967601
GZF1	1.027	1.001	1.054	0.967601
CENPB	1.003	1	1.005	0.967601
RBCK1	1.004	0.998	1.01	0.967601
NRSN2	1.006	1.001	1.011	0.967601
AP5S1	1.033	0.99	1.077	0.967601
BMP2	1.005	0.998	1.012	0.967601
FLRT3	1.01	1	1.02	0.967601
GFRA4	2.462	0.669	9.059	0.967601
LRRN4	1.026	0.994	1.059	0.967601
TBC1D20	1.015	1.001	1.028	0.967601
ITPA	1.004	0.999	1.008	0.967601
OTOR	2.648	0.895	7.832	0.967601
DEFB129	2.345	0.662	8.31	0.967601
S1PR4	1.019	0.991	1.048	0.967601
GDF5	0.879	0.737	1.049	0.967601
ID1	1.001	1	1.001	0.967601
AMOT	1.005	0.998	1.012	0.967601
PSMB2	1.003	0.999	1.008	0.967601
TMEM53	1.028	0.986	1.071	0.967601
XRCC3	0.98	0.953	1.007	0.967601
F10	1.078	0.995	1.168	0.967601
LRFN3	1.013	0.994	1.033	0.967601
CAPNS1	1.001	1	1.002	0.967601
GPR42	60.755	0.166	22203.5	0.967601
NR1D1	0.996	0.99	1.002	0.967601
WNK4	0.951	0.887	1.02	0.967601
ZNF384	0.988	0.97	1.005	0.967601
EMG1	0.992	0.981	1.002	0.967601
SSX1	1.01	0.998	1.023	0.967601
UXT	0.996	0.991	1	0.967601
SIX1	0.987	0.973	1.001	0.967601
DLGAP5	0.991	0.981	1.002	0.967601
ZBTB1	0.982	0.959	1.006	0.967601
TRMT5	0.962	0.932	0.994	0.967601
PLEKHG3	0.989	0.976	1.002	0.967601
FAM78A	1.028	0.991	1.066	0.967601
SLC10A3	1.004	0.998	1.009	0.967601
NXF5	3.923	0.641	24.019	0.967601
CANX	1.001	1	1.002	0.967601
RGS13	1.09	0.96	1.239	0.967601
IL22	2.208	0.976	4.996	0.967601
BEST3	1.084	0.98	1.2	0.967601
PTPRB	1.052	0.997	1.111	0.967601
TAS2R3	2.076	0.832	5.176	0.967601
IDUA	1.02	0.992	1.048	0.967601
FGFRL1	1.006	1	1.013	0.967601
PLA2G5	1.08	0.979	1.192	0.967601
ADGRE2	1.031	0.991	1.073	0.967601
OR7A10	3.062	0.572	16.389	0.967601
F2RL3	1.052	0.989	1.118	0.967601
UQCR11	0.987	0.971	1.004	0.967601
SYNGR3	1.024	0.998	1.051	0.967601
IL17B	0.681	0.391	1.187	0.967601
OR1E2	3.298	0.58	18.758	0.967601
METTL16	1.023	0.995	1.053	0.967601
ZNF835	1.142	1.008	1.294	0.967601
SEM1	0.994	0.985	1.002	0.967601
STYXL1	0.996	0.989	1.002	0.967601
ZNF780B	1.019	0.991	1.049	0.967601
LRFN1	1.014	0.997	1.03	0.967601
RASL11B	1.146	0.936	1.404	0.967601
KDR	1.012	0.998	1.025	0.967601
VPREB3	1.009	0.996	1.021	0.967601
GNAZ	1.015	0.998	1.032	0.967601
MGAT3	1.004	0.998	1.01	0.967601
MCHR1	1.084	0.974	1.206	0.967601
IGLL1	1.041	1	1.084	0.967601
RAC2	1.002	1	1.005	0.967601
SPECC1	1.039	0.998	1.083	0.967601
TAS2R16	18.763	0.762	461.934	0.967601
ATP6V1F	0.998	0.997	1	0.967601
CCDC136	0.936	0.873	1.004	0.967601
NDUFA5	0.976	0.944	1.01	0.967601
HOXD1	1.117	0.979	1.274	0.967601
HOXD3	1.07	0.99	1.157	0.967601
MTX2	0.997	0.992	1.001	0.967601
OSGEPL1	0.964	0.916	1.015	0.967601
CGNL1	1.023	0.994	1.052	0.967601
TMOD2	1.05	1.001	1.102	0.967601
DLL4	1.022	0.994	1.05	0.967601
ALDH1A2	1.033	0.985	1.083	0.967601
LOXL1	1.005	1	1.01	0.967601
COPB1	1.001	1	1.002	0.967601
CSRP3	1.541	0.878	2.706	0.967601
FXR2	1.009	0.996	1.022	0.967601
KIF1C	1.006	0.999	1.013	0.967601
SLC44A2	1.002	0.999	1.005	0.967601
SIGLEC9	1.042	1	1.087	0.967601
KLK8	1.021	0.999	1.043	0.967601
BCL2L2	0.991	0.981	1.002	0.967601
AJUBA	0.995	0.989	1.002	0.967601
DTD2	0.97	0.931	1.01	0.967601
PARP2	0.983	0.965	1.001	0.967601
HEATR5A	0.958	0.912	1.007	0.967601
EAPP	0.992	0.984	1	0.967601
NRL	0.766	0.529	1.108	0.967601
EPB41L4A	1.106	0.955	1.281	0.967601
FOXJ1	0.994	0.986	1.002	0.967601
ARHGEF6	1.018	0.996	1.041	0.967601
ASH2L	0.994	0.988	1	0.967601
ART1	3.36	1.004	11.242	0.967601
NXNL2	1.197	0.942	1.522	0.967601
STARD8	1.053	0.998	1.11	0.967601
SAT1	1	0.999	1	0.967601
ELOF1	0.992	0.979	1.004	0.967601
RPL36	1	0.999	1	0.967601
ATP8B3	0.952	0.892	1.017	0.967601
SLC27A1	1.032	0.994	1.071	0.967601
MRPL34	0.997	0.993	1.001	0.967601
LSM7	0.996	0.992	1	0.967601
RTN4IP1	1.015	0.996	1.035	0.967601
QRSL1	1.005	0.999	1.012	0.967601
MTRES1	1.002	0.999	1.005	0.967601
MAS1	5.44	0.674	43.879	0.967601
FCHO1	1.018	0.997	1.04	0.967601
MAP1S	1.009	0.996	1.022	0.967601
PGPEP1	1.017	0.992	1.041	0.967601
JUND	1.001	1	1.003	0.967601
OR11H1	63.977	0.302	13561.5	0.967601
HELZ2	1.011	0.996	1.026	0.967601
LSP1	1.007	1	1.013	0.967601
ATXN10	0.997	0.992	1.001	0.967601
PAK4	1.005	1.001	1.009	0.967601
UCK1	1.005	0.997	1.014	0.967601
SESN2	1.01	0.996	1.024	0.967601
MPP1	1.014	0.996	1.033	0.967601
ZNF331	1.008	0.997	1.019	0.967601
LRP3	1.007	0.997	1.018	0.967601
AKAP12	1.008	1	1.015	0.967601
ULBP3	0.985	0.966	1.006	0.967601
AAR2	1.006	0.999	1.013	0.967601
COX4I2	1.01	0.996	1.024	0.967601
BPIFA3	3.578	0.588	21.784	0.967601
GGT7	1.005	0.998	1.012	0.967601
DEFB118	2.425	0.713	8.249	0.967601
CHMP1A	1.007	0.999	1.014	0.967601
COX7B	0.997	0.994	1	0.967601
NFATC1	1.024	0.991	1.058	0.967601
ADGRE3	1.172	0.967	1.421	0.967601
SH3BP5	1.037	0.982	1.095	0.967601
RBSN	1.039	0.999	1.08	0.967601
GFPT2	1.012	1.001	1.024	0.967601
RPL27	1	0.999	1	0.967601
AOC3	1.007	1	1.013	0.967601
G6PC	2.55	1.119	5.813	0.967601
TMEM204	1.007	0.997	1.018	0.967601
TRAF7	1.004	1	1.007	0.967601
NINJ1	1.003	0.999	1.006	0.967601
NPHP4	1.068	1.002	1.139	0.967601
IL13RA1	1.004	1	1.007	0.967601
RARA	1.014	1	1.029	0.967601
KHDRBS3	1.025	0.989	1.063	0.967601
PEX11B	0.995	0.987	1.002	0.967601
RAI2	1.016	0.996	1.036	0.967601
USP29	2.275	0.874	5.922	0.967601
LLGL1	1.011	1.001	1.022	0.967601
RHPN2	1.005	1	1.009	0.967601
C19orf12	1.007	0.997	1.018	0.967601
FAAP24	1.008	0.996	1.02	0.967601
ACTR10	0.992	0.981	1.003	0.967601
ZSWIM4	1.04	0.998	1.084	0.967601
RFX1	1.027	0.994	1.062	0.967601
RAF1	1.026	0.996	1.057	0.967601
PPARG	1.01	0.996	1.024	0.967601
FCRLA	1.021	0.993	1.05	0.967601
EMILIN2	1.003	0.999	1.007	0.967601
TRIM5	1.021	0.992	1.051	0.967601
HHLA1	3.426	0.597	19.67	0.967601
PTCD3	0.985	0.965	1.005	0.967601
MRPL35	0.991	0.977	1.004	0.967601
SCLY	0.629	0.346	1.141	0.967601
PTPRE	1.019	0.995	1.043	0.967601
INPP5K	1.017	0.997	1.038	0.967601
POPDC3	1.012	1.002	1.023	0.967601
FTHL17	1.005	0.998	1.012	0.967601
WBP2	1.007	0.999	1.014	0.967601
UNK	0.983	0.965	1.001	0.967601
SDF2	0.993	0.984	1.003	0.967601
FLOT2	1.001	1	1.003	0.967601
TERF2	1.019	0.995	1.044	0.967601
VPS4A	1.013	0.995	1.032	0.967601
HSPA12B	1.023	0.989	1.058	0.967601
SCP2D1	2.162	0.759	6.16	0.967601
ATP1A4	1.101	0.985	1.232	0.967601
NES	1.004	0.999	1.01	0.967601
IGHMBP2	1.012	0.996	1.029	0.967601
SERINC3	1.004	1	1.007	0.967601
FBXO44	1.011	0.995	1.027	0.967601
CPLANE2	1.042	0.995	1.091	0.967601
CASP9	1.018	0.992	1.044	0.967601
ALOX5AP	1.003	1	1.007	0.967601
MYH10	1.005	0.998	1.012	0.967601
MPRIP	1.017	1.001	1.033	0.967601
PIK3C2B	1.02	0.998	1.041	0.967601
RXFP2	2.306	0.859	6.193	0.967601
EPHB2	1.015	1.001	1.03	0.967601
CNDP2	1.006	1	1.012	0.967601
PLAAT4	0.998	0.995	1	0.967601
NTS	1	1	1	0.967601
SFTPD	1.002	1	1.005	0.967601
SPINK5	0.996	0.991	1.001	0.967601
LYVE1	1.029	1.002	1.057	0.967601
RRAS2	1.002	1	1.004	0.967601
HSD17B4	1.016	1.001	1.032	0.967601
DGLUCY	0.986	0.968	1.005	0.967601
TTC9	0.995	0.989	1.001	0.967601
EIF2S1	0.995	0.987	1.002	0.967601
ADAM20	0.445	0.18	1.102	0.967601
PEBP4	1.004	0.999	1.01	0.967601
CTIF	1.02	1.002	1.037	0.967601
MRO	1.252	1.019	1.536	0.967601
CD180	1.047	0.999	1.096	0.967601
IRAK2	1.021	1.002	1.04	0.967601
CAMK1	1.325	1.005	1.747	0.967601
BHLHE40	1.001	1	1.002	0.967601
CNTN6	1.261	1.008	1.577	0.967601
KATNBL1	0.983	0.964	1.002	0.967601
GNAT2	1.219	1.009	1.473	0.967601
PRPF38B	0.989	0.974	1.004	0.967601
GSTM5	1.003	0.999	1.006	0.967601
CHIA	1.127	1.009	1.259	0.967601
SORT1	1.005	0.998	1.012	0.967601
WNT2B	0.969	0.935	1.004	0.967601
ADAM30	10.108	0.639	159.811	0.967601
NOTCH2	1.007	1.001	1.013	0.967601
CD101	1.06	0.977	1.151	0.967601
NGF	0.989	0.973	1.005	0.967601
LDHA	1.001	1	1.001	0.967601
IL6ST	1.008	0.999	1.017	0.967601
FST	0.999	0.997	1	0.967601
CRB1	2.051	0.92	4.574	0.967601
CFHR5	2.2	0.947	5.109	0.967601
RPS15A	0.99	0.978	1.002	0.967601
RBM17	0.994	0.985	1.003	0.967601
HRH4	3.079	1.029	9.212	0.967601
TMEM241	1.02	0.996	1.045	0.967601
DDB2	0.99	0.977	1.003	0.967601
USP26	1.345	0.875	2.069	0.967601
SPOCD1	1.024	0.989	1.06	0.967601
YARS1	1.007	0.997	1.018	0.967601
PHC2	1.003	0.999	1.008	0.967601
HOOK1	0.994	0.985	1.002	0.967601
ELP2	1.015	1	1.029	0.967601
DTNA	1.04	0.997	1.084	0.967601
TPGS2	1.006	0.998	1.015	0.967601
CBLIF	2.041	0.735	5.67	0.967601
FADS2	1.004	1	1.007	0.967601
PDGFRA	1.008	0.997	1.019	0.967601
ACRV1	0.76	0.545	1.058	0.967601
ETS1	1.004	0.999	1.008	0.967601
RFK	1.006	0.998	1.014	0.967601
ANXA1	1	0.999	1	0.967601
CEMIP2	1.006	0.998	1.013	0.967601
TBX3	1.006	0.999	1.014	0.967601
RNFT2	1.034	0.999	1.07	0.967601
P2RX4	1.027	1.002	1.053	0.967601
TRAFD1	1.006	0.999	1.012	0.967601
DMTF1	0.986	0.966	1.007	0.967601
CCDC146	0.976	0.943	1.01	0.967601
TMEM60	0.996	0.99	1.002	0.967601
CD36	1.008	0.997	1.02	0.967601
UGT2B28	1.167	1.007	1.353	0.967601
HTR1B	1.19	0.927	1.528	0.967601
SNX14	1.016	0.996	1.037	0.967601
CD63	1.001	1	1.001	0.967601
GDF11	0.979	0.949	1.009	0.967601
B4GALNT1	1.012	0.998	1.027	0.967601
FAIM2	1.063	1.003	1.128	0.967601
KRT7	1.001	1	1.001	0.967601
TAAR5	2.4	0.729	7.901	0.967601
GNS	1.003	1	1.006	0.967601
KLHL36	1.015	0.994	1.036	0.967601
DYNC1LI2	1.008	0.999	1.018	0.967601
AGT	1.011	0.995	1.027	0.967601
GLUL	0.999	0.998	1	0.967601
NPL	0.996	0.99	1.001	0.967601
TTLL4	1.005	0.998	1.013	0.967601
WNT10A	1.005	1	1.01	0.967601
CYP27A1	1.003	0.999	1.006	0.967601
REV1	0.982	0.961	1.004	0.967601
TMEM127	1.007	1.001	1.014	0.967601
ARHGEF4	0.987	0.975	1	0.967601
DRAM1	1.006	1	1.013	0.967601
SLC41A2	1.037	1.004	1.072	0.967601
LRCH1	1.032	0.986	1.081	0.967601
EDNRB	1.012	0.999	1.025	0.967601
SCRN1	1.003	0.999	1.008	0.967601
GPNMB	1	1	1	0.967601
DGKB	0.76	0.51	1.133	0.967601
TTC5	0.962	0.919	1.007	0.967601
ABHD17C	0.994	0.988	1	0.967601
TM6SF1	1.145	1.012	1.296	0.967601
RSAD1	0.988	0.973	1.003	0.967601
RTP4	0.994	0.988	1.001	0.967601
BLK	1.051	0.98	1.126	0.967601
GATA4	1.038	0.991	1.087	0.967601
CDK9	1.004	0.998	1.011	0.967601
TOR1A	1.009	0.999	1.019	0.967601
OR13C9	3.01	0.65	13.93	0.967601
ST6GALNAC4	1.008	0.997	1.019	0.967601
TMOD1	1.008	0.999	1.017	0.967601
DAB2IP	1.006	0.999	1.012	0.967601
SLC31A2	1.402	0.876	2.246	0.967601
TLR4	1.027	0.989	1.066	0.967601
TSTD2	1.031	0.986	1.077	0.967601
HEMGN	1.75	0.944	3.245	0.967601
ENPP2	1.007	0.999	1.014	0.967601
APTX	0.979	0.951	1.009	0.967601
RNF38	1.007	0.998	1.016	0.967601
CCL21	1.001	1	1.002	0.967601
DMRT1	0.949	0.879	1.025	0.967601
HINT2	1.546	1.025	2.331	0.967601
ARHGEF39	1.027	0.997	1.058	0.967601
IGFBPL1	1.01	0.999	1.021	0.967601
RPS6	1	1	1	0.967601
IRF4	1.021	0.993	1.049	0.967601
LRRC1	0.989	0.977	1.002	0.967601
RIPK1	1.026	0.992	1.061	0.967601
UQCC2	0.988	0.975	1	0.967601
HMGA1	1	0.999	1	0.967601
FLOT1	1.002	1	1.004	0.967601
TPMT	0.991	0.981	1.001	0.967601
VARS2	0.578	0.255	1.313	0.967601
MGARP	0.687	0.438	1.078	0.967601
ARRB1	1.022	0.997	1.047	0.967601
SLCO2B1	1.01	1.001	1.02	0.967601
SYTL2	1.018	0.991	1.045	0.967601
LRRC32	1.011	1	1.021	0.967601
SDCBP	1.002	1	1.004	0.967601
NXPE4	1.399	0.926	2.113	0.967601
TRIM29	0.999	0.997	1	0.967601
BTG4	0.862	0.712	1.044	0.967601
TMPRSS13	0.992	0.981	1.004	0.967601
THBS1	1.001	1	1.002	0.967601
SMAD6	1.052	1.002	1.104	0.967601
SPTBN5	0.89	0.784	1.01	0.967601
BCAR3	1.015	1	1.03	0.967601
ARHGAP29	1.026	0.994	1.06	0.967601
SLC44A5	0.978	0.957	1	0.967601
CGREF1	0.982	0.962	1.002	0.967601
HADHB	0.996	0.99	1.001	0.967601
PPM1B	0.965	0.927	1.005	0.967601
PNPT1	0.992	0.983	1.002	0.967601
THUMPD2	0.962	0.931	0.995	0.967601
DTNB	0.981	0.957	1.005	0.967601
CYP2C9	0.891	0.762	1.042	0.967601
BTBD16	1.004	0.999	1.009	0.967601
CALHM2	1.016	0.999	1.033	0.967601
MSTN	1.052	0.987	1.121	0.967601
NAB1	0.993	0.984	1.002	0.967601
PPIG	0.987	0.97	1.005	0.967601
GUCA1C	1.114	0.997	1.244	0.967601
SECISBP2L	1.023	1.003	1.044	0.967601
CILP	1.008	0.998	1.019	0.967601
MMRN1	1.035	0.997	1.074	0.967601
BMP2K	1.047	0.978	1.12	0.967601
SLC39A8	1.006	1	1.011	0.967601
FBN2	0.995	0.991	1	0.967601
RGS3	1.034	1	1.07	0.967601
FGD4	1.031	0.985	1.078	0.967601
ALG10	0.954	0.894	1.017	0.967601
ZCRB1	1.011	0.995	1.026	0.967601
NDUFA9	0.905	0.824	0.995	0.967601
VAMP1	0.972	0.94	1.005	0.967601
TAPBPL	0.994	0.986	1.002	0.967601
SLC38A4	0.971	0.938	1.004	0.967601
TMEM19	1.009	0.997	1.022	0.967601
PTPRQ	1.056	0.98	1.138	0.967601
SLC15A4	1.022	0.997	1.047	0.967601
GLTP	0.999	0.997	1	0.967601
PDX1	1.075	0.973	1.188	0.967601
GPR84	1.046	1.002	1.093	0.967601
CSAD	0.981	0.959	1.002	0.967601
TMBIM6	1.001	1	1.002	0.967601
METTL21C	2.718	0.906	8.157	0.967601
GRTP1	0.991	0.977	1.005	0.967601
CDH24	0.988	0.975	1	0.967601
REM2	0.811	0.669	0.983	0.967601
FITM1	0.669	0.408	1.095	0.967601
TMX1	0.993	0.985	1	0.967601
FRMD6	0.994	0.988	0.999	0.967601
PELI2	0.985	0.968	1.003	0.967601
SLC38A6	0.941	0.892	0.994	0.967601
ADAM21	0.777	0.594	1.016	0.967601
RDH12	1.049	0.996	1.103	0.967601
ESR2	0.788	0.586	1.06	0.967601
STON2	0.99	0.979	1.001	0.967601
PTGR2	0.727	0.478	1.106	0.967601
FBLN5	1.008	0.997	1.019	0.967601
SLC25A47	1.507	0.842	2.696	0.967601
WDR20	0.963	0.922	1.005	0.967601
DUOXA1	0.99	0.975	1.005	0.967601
SLC27A2	0.988	0.97	1.006	0.967601
TLNRD1	1.016	0.999	1.033	0.967601
USP3	1.047	0.995	1.101	0.967601
GOLGA6D	100.398	0.29	34715.9	0.967601
ITGAX	1.008	0.997	1.021	0.967601
CDR2	1.016	0.998	1.035	0.967601
NKD1	1.008	0.998	1.018	0.967601
CLEC18B	0.735	0.521	1.039	0.967601
KATNB1	1.013	0.995	1.031	0.967601
CMTM3	1.007	1.001	1.013	0.967601
NOL3	1.007	0.999	1.015	0.967601
MAP1LC3B	1.008	1.001	1.016	0.967601
MBTPS1	1.008	1	1.016	0.967601
GALNS	1.016	1	1.032	0.967601
GAS8	1.043	0.988	1.1	0.967601
NCOR1	1.019	1.002	1.036	0.967601
COPS3	1.003	0.998	1.008	0.967601
ZNF287	1.111	1.001	1.234	0.967601
VPS53	1.04	0.989	1.095	0.967601
SPACA3	1.253	0.999	1.571	0.967601
PTRH2	0.975	0.953	0.997	0.967601
SLC39A6	1.003	1	1.006	0.967601
RPRD1A	1.005	0.998	1.013	0.967601
GALNT1	1.002	0.999	1.004	0.967601
MEP1B	1.456	0.835	2.539	0.967601
OSBPL1A	1.011	0.998	1.024	0.967601
GATA6	1.021	0.991	1.051	0.967601
RMC1	1.012	1	1.024	0.967601
ASGR1	1.092	0.966	1.235	0.967601
CARD14	0.939	0.874	1.01	0.967601
RAB40B	0.99	0.978	1.002	0.967601
EIF4A3	0.996	0.992	1.001	0.967601
TNFRSF11A	1.051	0.985	1.122	0.967601
PNMT	1.033	1.003	1.064	0.967601
ARL5C	37.068	0.483	2847.12	0.967601
IGFBP4	1	1	1.001	0.967601
CACNA1A	0.597	0.299	1.191	0.967601
AC008764.1	1.32555e+08	1.056	1.66382e+16	0.967601
HUNK	1.021	0.99	1.052	0.967601
EMP3	1.004	1	1.008	0.967601
CBLC	0.997	0.993	1.001	0.967601
RNPEPL1	1.013	1.001	1.026	0.967601
NLRP12	1.125	1.007	1.257	0.967601
PSMB6	1.001	0.999	1.003	0.967601
RERE	1.01	1	1.019	0.967601
CFAP74	1.082	0.983	1.189	0.967601
CELA2A	2.684	0.701	10.271	0.967601
EPHA2	1.002	1	1.005	0.967601
EFHD2	1.001	1	1.002	0.967601
PEX14	1.013	0.998	1.029	0.967601
MYOM3	1.055	0.975	1.142	0.967601
C1orf216	1.014	0.996	1.031	0.967601
FCN3	1.006	1	1.012	0.967601
GPN2	1.021	0.995	1.048	0.967601
WDTC1	1.006	1	1.013	0.967601
CELA3A	198.629	0.278	141907	0.967601
CCN1	1.001	1	1.003	0.967601
BEST4	0.888	0.765	1.03	0.967601
LMO4	0.997	0.994	1	0.967601
SYPL2	1.1	1.004	1.205	0.967601
FNDC7	2.679	0.913	7.861	0.967601
CD53	1.002	0.999	1.005	0.967601
ITGA10	1.141	1.013	1.287	0.967601
GPA33	1.109	0.953	1.291	0.967601
XCL2	0.953	0.901	1.008	0.967601
MGST3	1.013	1.002	1.025	0.967601
FCGR2A	1.009	1.001	1.016	0.967601
F13B	4.597	1.113	18.985	0.967601
MRPL24	0.998	0.995	1.001	0.967601
CASQ1	1.044	0.982	1.11	0.967601
TUFT1	0.998	0.995	1.001	0.967601
ADAMTSL4	1.003	0.999	1.008	0.967601
SUSD4	0.993	0.987	0.999	0.967601
HHIPL2	1.017	0.994	1.039	0.967601
FLG2	1.201	0.973	1.482	0.967601
HAX1	0.998	0.995	1.001	0.967601
KCNN3	1.069	0.992	1.153	0.967601
GDF7	1.033	0.999	1.069	0.967601
ATP6V1C2	1.011	1.001	1.02	0.967601
CHAC2	0.989	0.978	1.001	0.967601
SNRPG	0.998	0.996	1.001	0.967601
NAT8	0.516	0.202	1.319	0.967601
DQX1	0.986	0.967	1.006	0.967601
DUSP11	0.99	0.977	1.002	0.967601
RABL2A	0.962	0.911	1.017	0.967601
FBLN7	0.944	0.873	1.022	0.967601
LIPT1	0.927	0.863	0.997	0.967601
NXPH2	1.072	0.996	1.154	0.967601
GULP1	0.985	0.969	1.001	0.967601
KANSL1L	1.043	0.983	1.106	0.967601
RAB5A	1.014	0.999	1.029	0.967601
EAF1	1.039	0.998	1.081	0.967601
CNTN4	1.085	0.961	1.226	0.967601
STAC	1.03	0.992	1.07	0.967601
IQSEC1	1.019	0.998	1.04	0.967601
CAND2	0.958	0.903	1.015	0.967601
SLC25A26	1.043	0.981	1.109	0.967601
LRIG1	0.993	0.984	1.003	0.967601
NFKBIZ	0.994	0.987	1.001	0.967601
ADGRG7	0.98	0.955	1.005	0.967601
SRPRB	0.997	0.992	1.001	0.967601
MED12L	0.892	0.762	1.044	0.967601
EIF2A	0.995	0.989	1.001	0.967601
RUBCN	1.045	0.988	1.106	0.967601
NICN1	2.74619e+12	2.489	3.02961e+24	0.967601
EIF2B5	0.996	0.992	1	0.967601
TRMT10A	0.933	0.874	0.996	0.967601
RPS3A	0.999	0.998	1	0.967601
RNF175	0.903	0.807	1.011	0.967601
ADAMTS16	1.027	0.997	1.057	0.967601
OTULINL	1.02	0.992	1.048	0.967601
RPL37	0.999	0.998	1	0.967601
LHFPL2	1.013	0.998	1.028	0.967601
IQGAP2	1.027	0.996	1.058	0.967601
CRHBP	0.687	0.427	1.106	0.967601
TSLP	0.946	0.899	0.995	0.967601
MEGF10	0.964	0.924	1.006	0.967601
GLRA1	2.322	0.754	7.153	0.967601
N4BP3	1.029	0.991	1.068	0.967601
RMND5B	1.023	0.996	1.05	0.967601
DCDC2	1.072	0.974	1.181	0.967601
SLC17A4	2.381	0.902	6.28	0.967601
KAAG1	3.883	0.588	25.634	0.967601
TRIM41	1.035	0.987	1.085	0.967601
SCUBE3	0.984	0.965	1.003	0.967601
NFKBIE	1.007	0.998	1.016	0.967601
CYP39A1	1.019	0.993	1.046	0.967601
GABRR1	0.939	0.88	1.001	0.967601
RSPO3	1.031	0.998	1.067	0.967601
TAAR2	2.433	0.749	7.903	0.967601
TAAR8	2.881	0.734	11.309	0.967601
SLC18B1	0.992	0.981	1.003	0.967601
GNA12	1.004	0.998	1.01	0.967601
TRIM50	0.561	0.24	1.312	0.967601
TMEM140	1.01	0.996	1.024	0.967601
ASB10	2.997	0.62	14.486	0.967601
SH3KBP1	1.009	0.999	1.019	0.967601
MSN	1.001	1	1.002	0.967601
AKAP4	4.492	0.655	30.82	0.967601
HDAC8	0.768	0.561	1.051	0.967601
DIPK2B	1.044	0.988	1.103	0.967601
KRBOX4	0.97	0.935	1.006	0.967601
GNRH1	0.901	0.798	1.018	0.967601
DOK2	1.01	0.998	1.023	0.967601
DOCK5	1.016	0.992	1.04	0.967601
PLPBP	0.996	0.992	1	0.967601
ERLIN2	0.995	0.989	1.002	0.967601
TRIM55	1.103	0.992	1.226	0.967601
TERF1	0.952	0.901	1.006	0.967601
RPL7	1	0.999	1	0.967601
DPYS	0.704	0.477	1.041	0.967601
POLR2K	0.996	0.993	1	0.967601
NDUFB9	0.988	0.971	1.005	0.967601
IFNA16	2.606	0.745	9.12	0.967601
AUH	1.018	0.994	1.043	0.967601
OR13C4	2.509	0.667	9.437	0.967601
STOM	1.001	1	1.002	0.967601
SURF4	1.001	1	1.003	0.967601
GBGT1	1.044	0.991	1.099	0.967601
SH3GLB2	1.007	0.999	1.016	0.967601
LRSAM1	1.033	0.985	1.083	0.967601
NACC2	1.023	1.004	1.042	0.967601
COMMD3	0.958	0.918	0.999	0.967601
PARD3	0.995	0.989	1.001	0.967601
A1CF	4.057	1.238	13.298	0.967601
LRIT1	9.081	1.086	75.937	0.967601
RGR	3.277	1.022	10.513	0.967601
CAMK2G	1.012	0.997	1.027	0.967601
ANKRD1	1.012	1	1.025	0.967601
FRA10AC1	0.962	0.908	1.019	0.967601
ADD3	0.995	0.989	1	0.967601
DNAJB12	1.015	0.998	1.032	0.967601
CYP17A1	3.843	0.661	22.341	0.967601
INA	1.004	0.999	1.009	0.967601
MTG1	0.86	0.734	1.008	0.967601
PAOX	0.587	0.328	1.051	0.967601
BTBD10	1.003	0.999	1.006	0.967601
SYT8	1.003	1	1.006	0.967601
APIP	0.966	0.923	1.01	0.967601
GLYAT	2.288	0.76	6.885	0.967601
SERPING1	1.002	1	1.004	0.967601
OR5F1	3.423	0.652	17.964	0.967601
PTPRJ	1.016	0.998	1.034	0.967601
SESN3	0.998	0.995	1	0.967601
TENM4	0.986	0.967	1.006	0.967601
PAK1	0.997	0.994	1.001	0.967601
DRD2	1.023	0.992	1.056	0.967601
HYOU1	1.002	0.999	1.004	0.967601
FADS1	1.007	1	1.014	0.967601
PLCH2	0.99	0.975	1.005	0.967601
CHEK1	0.986	0.968	1.004	0.967601
MPZL2	0.998	0.996	1.001	0.967601
DUSP15	1.08	0.997	1.169	0.967601
COMMD7	1.004	0.999	1.009	0.967601
OCSTAMP	1.697	0.859	3.351	0.967601
SPINT4	1.934	0.817	4.579	0.967601
FERMT3	1.006	1	1.013	0.967601
VPS51	1.007	0.998	1.017	0.967601
TBX6	0.975	0.947	1.004	0.967601
ALDOA	1.032	1.005	1.061	0.967601
MPP7	0.987	0.974	1.001	0.967601
FXYD4	1.027	0.987	1.069	0.967601
TRIM48	1.023	0.992	1.054	0.967601
OR8K1	2.627	0.751	9.186	0.967601
CTF1	0.989	0.975	1.003	0.967601
TMEM218	0.965	0.924	1.008	0.967601
LATS2	1.016	1.001	1.031	0.967601
KIAA1328	1.164	1.011	1.34	0.967601
MIA2	0.986	0.969	1.004	0.967601
LYPD1	0.889	0.777	1.017	0.967601
VEGFC	1.01	0.997	1.023	0.967601
CNDP1	1.229	0.948	1.593	0.967601
TIMM8B	0.997	0.994	1	0.967601
PTS	0.989	0.976	1.002	0.967601
RILPL2	1.024	0.996	1.053	0.967601
LYZL2	1.059	0.975	1.149	0.967601
THRB	1.054	1.007	1.103	0.967601
UEVLD	1.023	0.995	1.051	0.967601
AKAP6	1.104	1.013	1.203	0.967601
FAM177A1	0.985	0.965	1.004	0.967601
MBIP	0.987	0.972	1.001	0.967601
MIPOL1	0.862	0.729	1.018	0.967601
MSGN1	0.926	0.844	1.017	0.967601
SLC25A31	2.701	0.754	9.684	0.967601
PTPRO	1.037	0.996	1.08	0.967601
ADAM8	1.005	1	1.01	0.967601
WWC2	1.03	0.992	1.07	0.967601
PABPC3	0.827	0.679	1.006	0.967601
TMEM267	0.988	0.973	1.002	0.967601
DST	0.996	0.991	1.001	0.967601
KCNE4	1.008	0.999	1.017	0.967601
MZT2B	0.994	0.987	1.001	0.967601
TUBA3E	1.021	1.002	1.041	0.967601
MGAT5	1.004	0.998	1.01	0.967601
HSPB8	1.005	0.999	1.011	0.967601
GEMIN6	0.962	0.928	0.997	0.967601
RIT2	2.501	0.885	7.07	0.967601
ATP5F1A	1.002	1	1.004	0.967601
G6PC2	2.063	0.918	4.634	0.967601
TGOLN2	1.003	1	1.006	0.967601
ATG10	1.05	0.978	1.127	0.967601
POC5	1.047	1	1.096	0.967601
GUCY1A2	1.076	0.968	1.196	0.967601
RPP38	0.97	0.935	1.005	0.967601
CCDC50	1.01	1.001	1.02	0.967601
ZFP36L2	1.003	1	1.006	0.967601
SPEF2	0.931	0.837	1.036	0.967601
MBNL1	0.992	0.984	1.001	0.967601
DDX4	1.384	0.863	2.219	0.967601
PELO	1.015	0.996	1.033	0.967601
RASGRP3	1.07	0.981	1.166	0.967601
SLC16A12	1.102	0.998	1.217	0.967601
MED21	0.994	0.986	1.003	0.967601
ZIC1	1.021	0.996	1.047	0.967601
CAST	1.008	0.999	1.016	0.967601
SCOC	0.993	0.983	1.003	0.967601
TRAPPC8	1.016	0.994	1.038	0.967601
LPCAT1	1.001	1	1.002	0.967601
TMEM251	0.971	0.945	0.998	0.967601
RMND5A	0.995	0.988	1.002	0.967601
RPIA	0.995	0.99	1.001	0.967601
TGIF2LX	0.931	0.839	1.032	0.967601
ZDHHC7	1.005	0.999	1.011	0.967601
TMPRSS11D	0.998	0.995	1.001	0.967601
CMIP	1.006	0.997	1.015	0.967601
CEBPG	1.002	0.999	1.005	0.967601
DDAH1	1.007	0.998	1.016	0.967601
ANKFN1	1.137	0.999	1.295	0.967601
GDPD1	0.937	0.871	1.008	0.967601
PPP2R5E	0.984	0.964	1.004	0.967601
GRAP	1.416	1.027	1.95	0.967601
SDHAF4	0.991	0.98	1.001	0.967601
UBASH3B	1.023	0.998	1.049	0.967601
ROBO4	1.035	0.998	1.073	0.967601
CC2D1B	1.018	0.993	1.043	0.967601
ABCA6	1.146	0.955	1.375	0.967601
ENPP3	1.051	1.003	1.101	0.967601
OBSCN	0.949	0.883	1.021	0.967601
GPR26	0.447	0.147	1.357	0.967601
BTG3	0.997	0.992	1.002	0.967601
MRPL39	0.994	0.986	1.002	0.967601
ATP5PF	0.996	0.99	1.002	0.967601
SLFN13	1.008	0.999	1.016	0.967601
WNT7A	1.018	0.998	1.037	0.967601
PLCL2	1.063	1.005	1.126	0.967601
SKA1	1.013	0.999	1.027	0.967601
USP43	1.02	0.997	1.043	0.967601
RSPH10B	0.04	0.001	3.056	0.967601
KLF10	1.002	0.999	1.005	0.967601
OTUD6B	0.984	0.963	1.005	0.967601
[truncated: 17,506 more rows]
